# Supplementary material
Source: PubMed Central journal article supplement (PMC4481187)
Supplement: NIHMS699734-supplement-ESI.pdf [file NIHMS699734-supplement-ESI.pdf]

## Electronic Supplementary Information

### **5-Thiocyanato-2'-Deoxyuridine as a Possible Radiosensitizer: Electron-Induced Formation of Uracil-C5-Thiyl Radical and Its Dimerization**

**Magdalena Zdrowowicz,<sup>a</sup> Lidia Chomicz,<sup>a</sup> Michał Żyndul,<sup>a</sup> Paweł Wityk,<sup>a</sup> Janusz Rak,<sup>a,\*</sup>**

**Tyler J. Wiegand,<sup>b</sup> Cameron G. Hanson,<sup>b</sup> Amitava Adhikary,<sup>b</sup> Michael D. Sevilla<sup>b,\*</sup>**

<sup>a</sup>Faculty of Chemistry, University of Gdańsk, Wita Stwosza 63, 80-308 Gdańsk, Poland

<sup>b</sup>Department of Chemistry, Oakland University, Rochester, Michigan 48309, USA

## Table of Content

|                                                                                                                                          |     |
|------------------------------------------------------------------------------------------------------------------------------------------|-----|
| Figure S1.....                                                                                                                           | S3  |
| Figure S2.....                                                                                                                           | S4  |
| Figure S3.....                                                                                                                           | S5  |
| Figure S4.....                                                                                                                           | S6  |
| Figure S5.....                                                                                                                           | S7  |
| Figure S6.....                                                                                                                           | S8  |
| Figure S7.....                                                                                                                           | S9  |
| Figure S8.....                                                                                                                           | S10 |
| Figure S9.....                                                                                                                           | S11 |
| Figure S10.....                                                                                                                          | S12 |
| Stationary points geometries – Cartesian coordinates and absolute values of electronic energy (E) and free enthalpy (G), in Hartree..... | S13 |

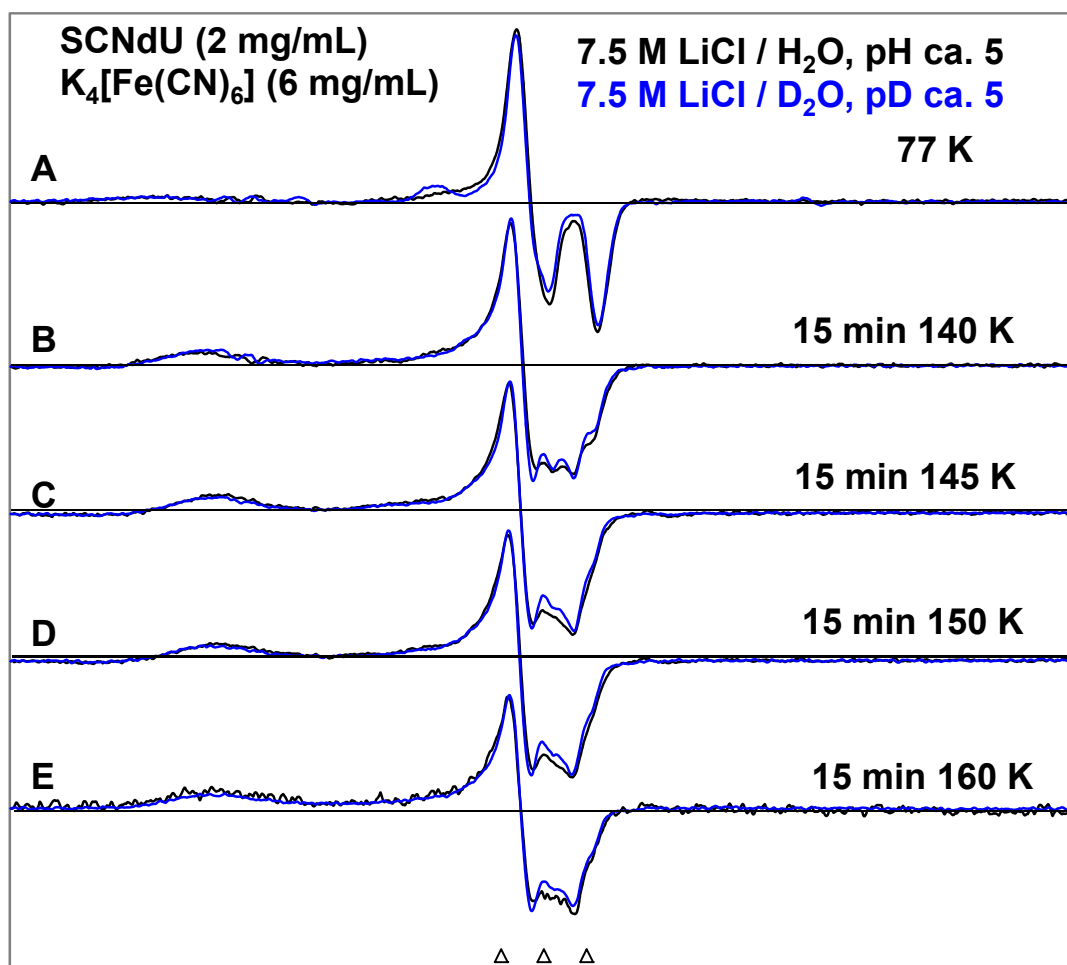

**Figure S1.** ESR spectra recorded at 77 K of matched  $\gamma$ -irradiated (77 K) N<sub>2</sub>-saturated 7.5 M LiCl/D<sub>2</sub>O and 7.5 M LiCl/H<sub>2</sub>O solutions of SCNdU (2 mg/mL) with a hole scavenger K<sub>4</sub>[Fe(CN)<sub>6</sub>] (6 mg/mL). (A) The  $\pi$ -anion radical of SCNdU upon  $e_{pre}^-$  addition. Both spectra show the line components from U-5-S• as well (see Figure 1(A) in the main manuscript). Spectra (B) to (E) were obtained after at 140 to 160 K. Both spectra in Figure S1(E) are assigned to U-5-S• (see Figure 1 and its discussion in the main manuscript). The three reference markers (open triangles) in this Figure and in other Figures represent the position of Fremy's salt resonance with the central marker at  $g = 2.0056$  and 13.09 G line spacing.

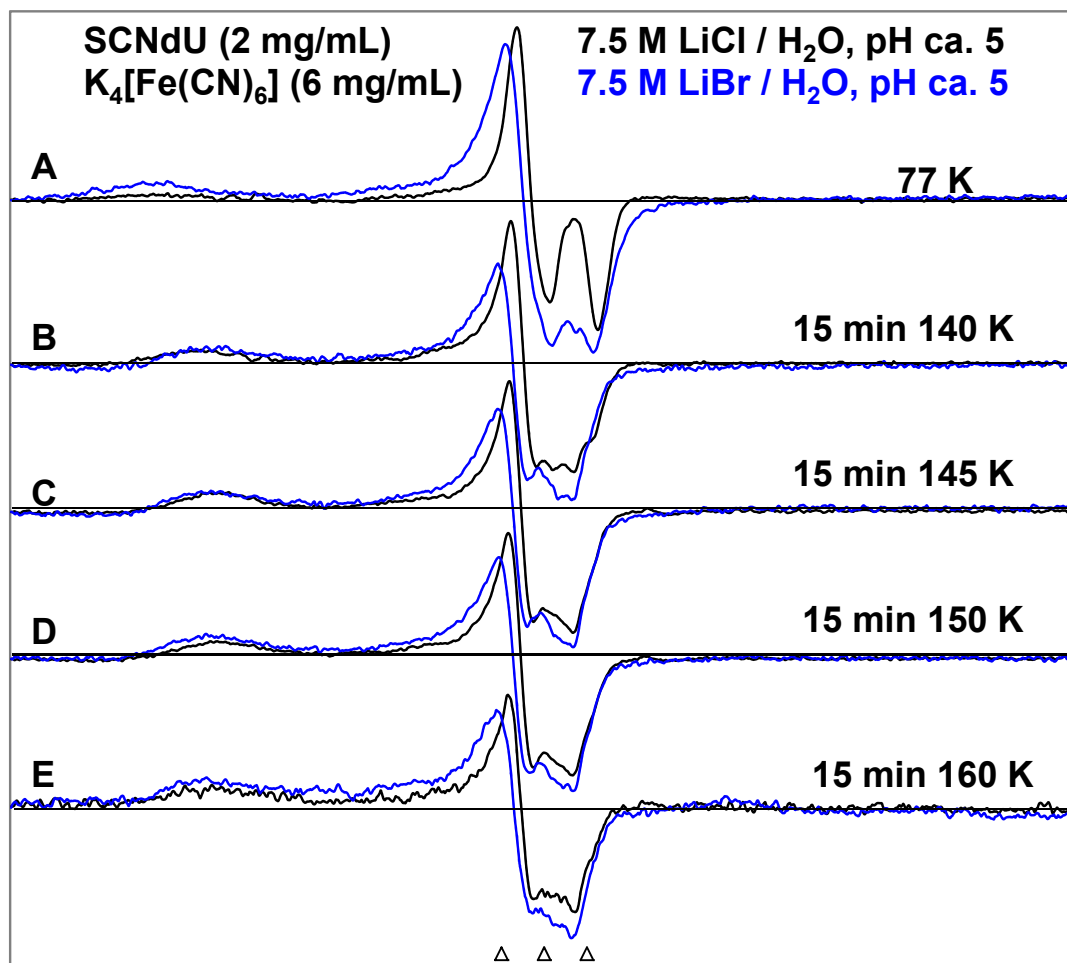

**Figure S2.** ESR spectra recorded at 77 K of matched  $\gamma$ -irradiated (77 K)  $N_2$ -saturated 7.5 M LiCl/ $H_2O$  and 7.5 M LiBr/ $H_2O$  solutions of SCNdU (2 mg/mL) with a hole scavenger  $K_4[Fe(CN)_6]$  (6 mg/mL). (A) The  $\pi$ -anion radical of SCNdU upon  $e_{pre}^-$  addition. Both spectra show the line components from U-5-S $\cdot$  as well (see Figure 1(A) in the main manuscript). Spectra (B) to (E) were obtained after at 140 to 160 K. Both spectra in Figure (E) are assigned to U-5-S $\cdot$  (see Figure 1 and its discussion in the main manuscript).

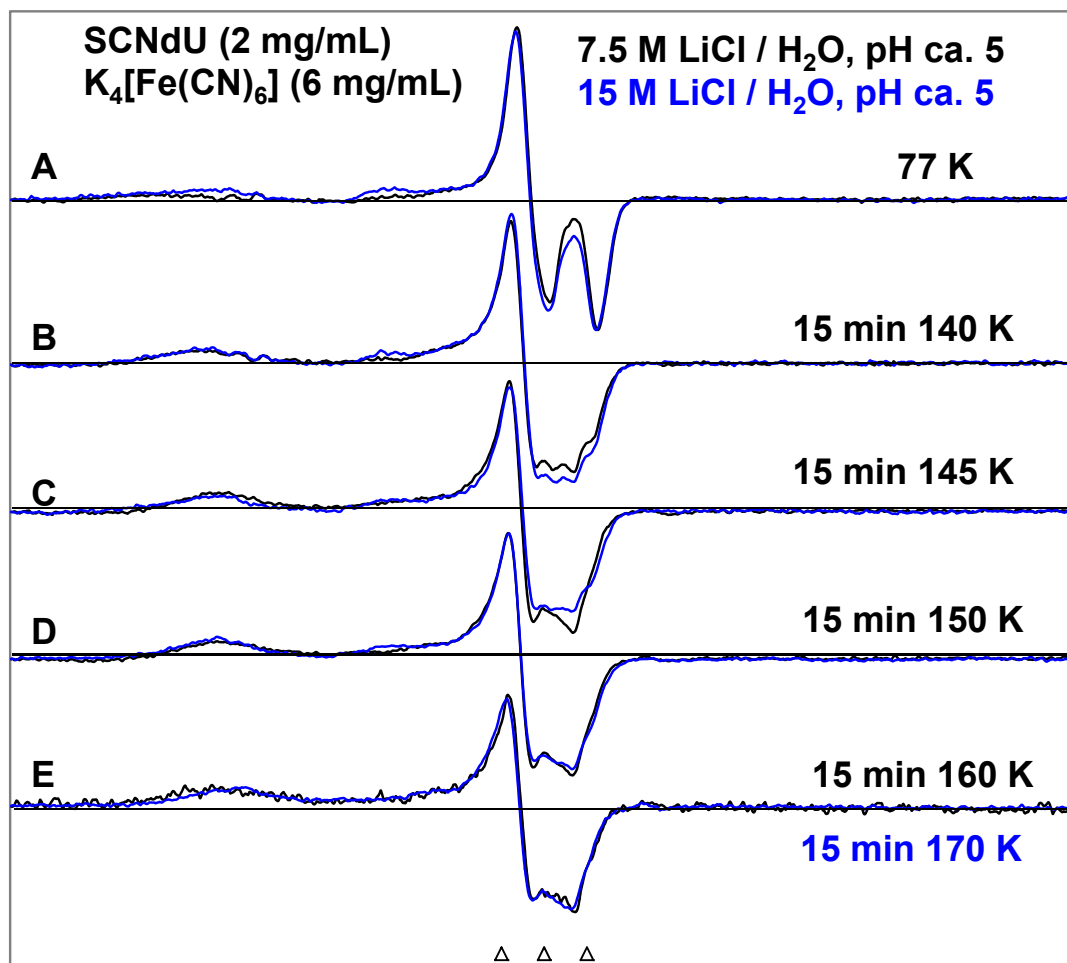

**Figure S3.** ESR spectra recorded at 77 K of matched  $\gamma$ -irradiated (77 K)  $\text{N}_2$ -saturated 7.5 M LiCl/ $\text{H}_2\text{O}$  and 15 M LiCl/ $\text{H}_2\text{O}$  solutions of SCNdU (2 mg/mL) with a hole scavenger  $\text{K}_4[\text{Fe}(\text{CN})_6]$  (6 mg/mL). (A) The  $\pi$ -anion radical of SCNdU upon  $e_{\text{pre}}^-$  addition. Both spectra show the line components from U-5-S $\cdot$  as well (see Figure 1(A) in the main manuscript). Spectra (B) to (E) were obtained after at 140 to 170 K. Both spectra in Figure (E) are assigned to U-5-S $\cdot$  (see Figure 1 and its discussion in the main manuscript).

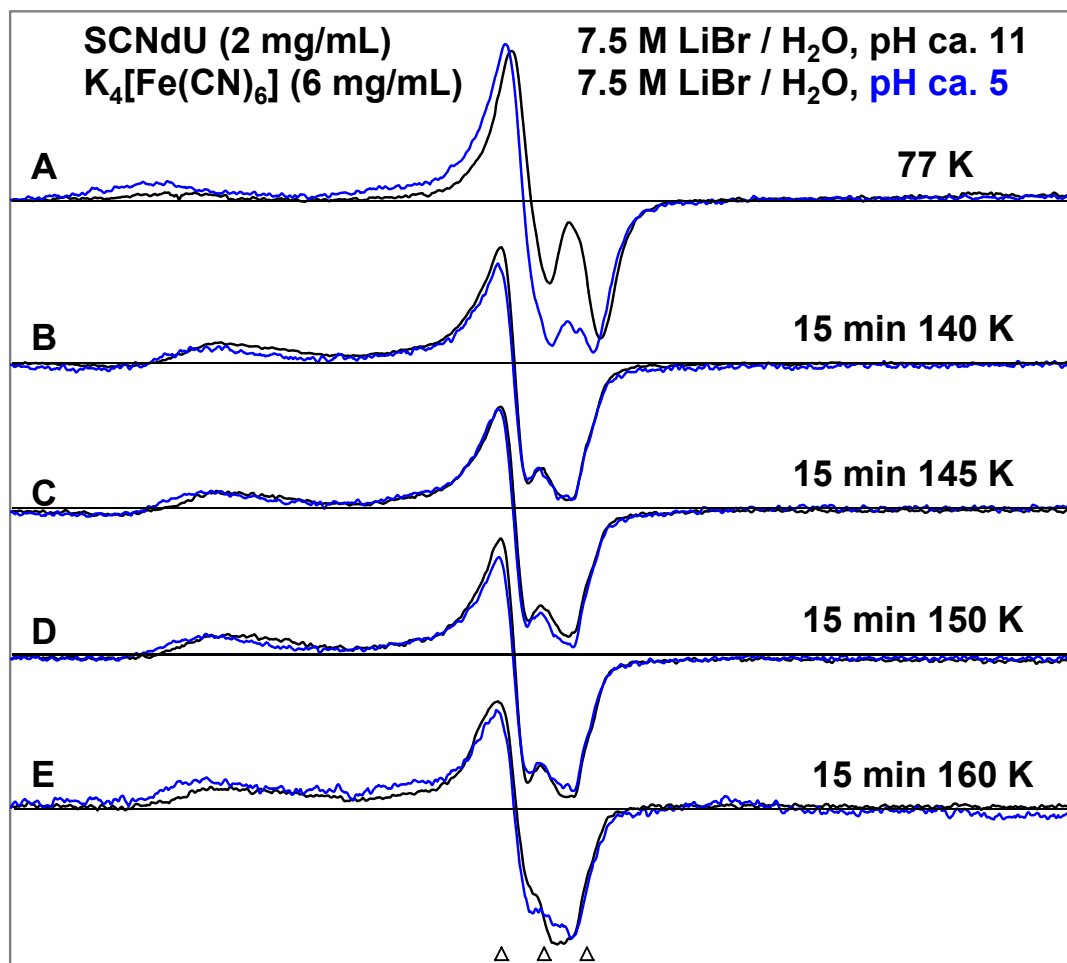

**Figure S4.** ESR spectra recorded at 77 K of matched  $\gamma$ -irradiated (77 K)  $\text{N}_2$ -saturated 7.5 M LiBr/ $\text{H}_2\text{O}$  solutions with pHs ca. 5 and ca. 11 of SCNdU (2 mg/mL) with a hole scavenger  $\text{K}_4[\text{Fe}(\text{CN})_6]$  (6 mg/mL). (A) The  $\pi$ -anion radical of SCNdU upon  $e_{\text{pre}}^-$  addition. Both spectra show the line components from U-5-S $\cdot$  as well (see Figure 1(A) in the main manuscript). Spectra (B) to (E) were obtained after at 140 to 160 K. Both spectra in Figure (E) are assigned to U-5-S $\cdot$  (see Figure 1 and its discussion in the main manuscript).

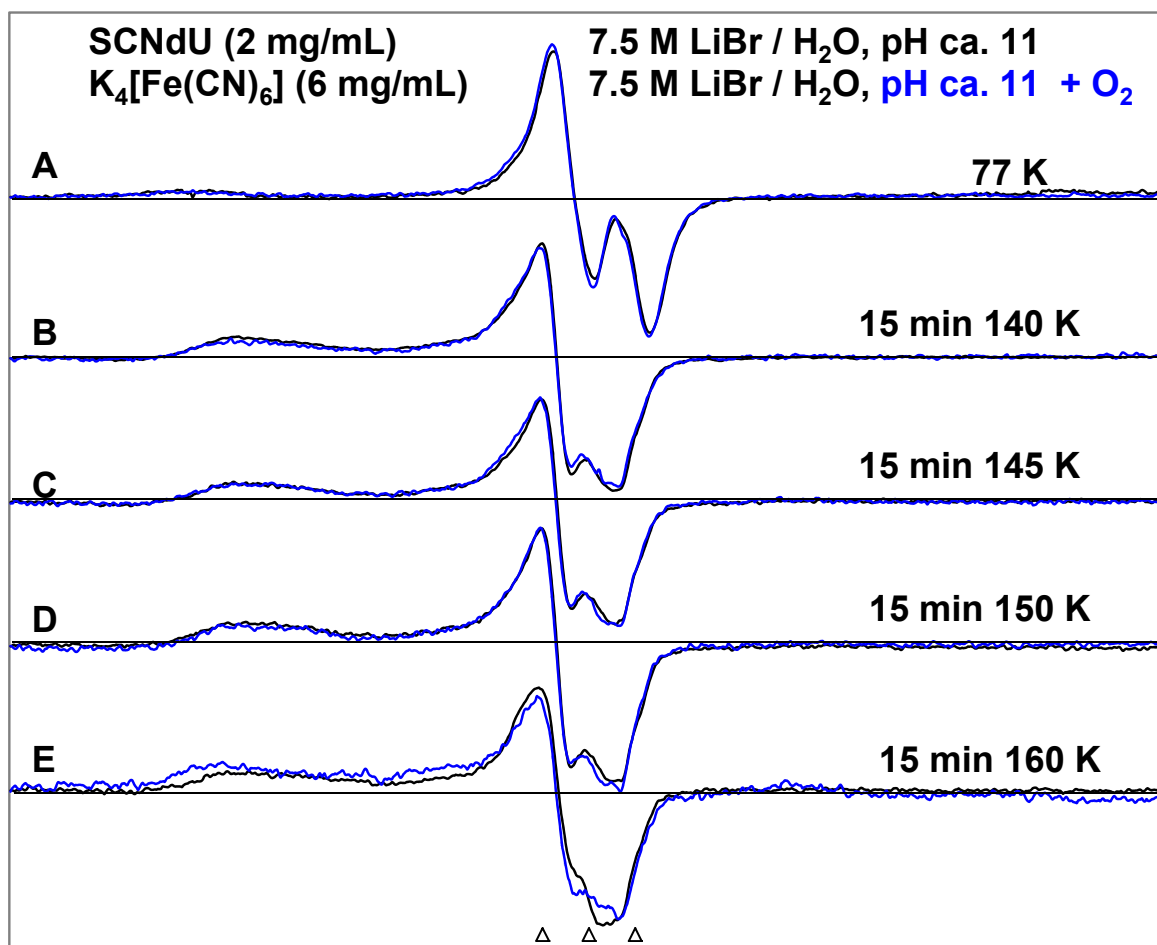

**Figure S5.** ESR spectra recorded at 77 K of matched  $\gamma$ -irradiated (77 K) N<sub>2</sub>-saturated 7.5 M LiBr/H<sub>2</sub>O solutions with pH ca. 11 and in the presence and in absence of oxygen of SCNdU (2 mg/mL) with a hole scavenger K<sub>4</sub>[Fe(CN)<sub>6</sub>] (6 mg/mL). Oxygen was bubbled for a minute into the solution. (A) The  $\pi$ -anion radical of SCNdU upon  $e_{\text{pre}}^-$  addition. Both spectra show the line components from U-5-S• as well (see Figure 1(A) in the main manuscript). Spectra (B) to (E) were obtained after at 140 to 160 K. Both spectra in Figure (E) are assigned to U-5-S• (see Figure 1 and its discussion in the main manuscript).

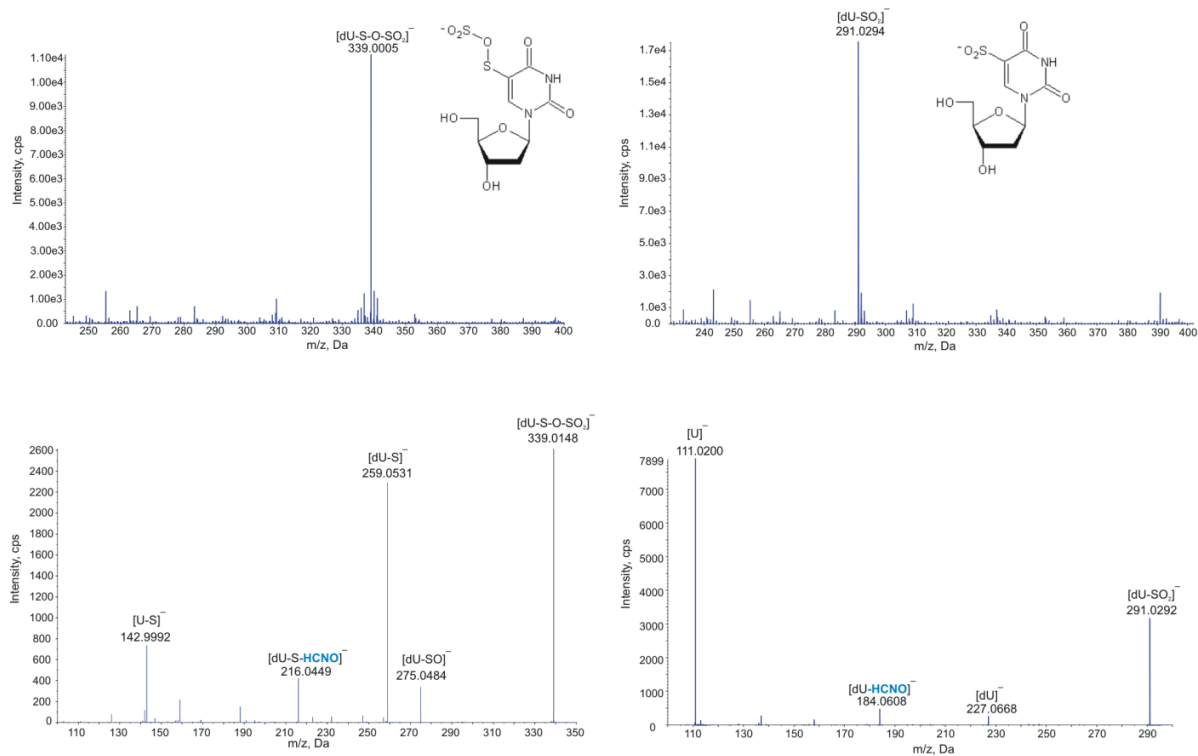

**Figure S6.** MS (upper panel) and MS/MS (lower panel) spectra (in negative ionization mode) of the additional products of the radiolysis (the dose of 50 Gy) and ion identities.



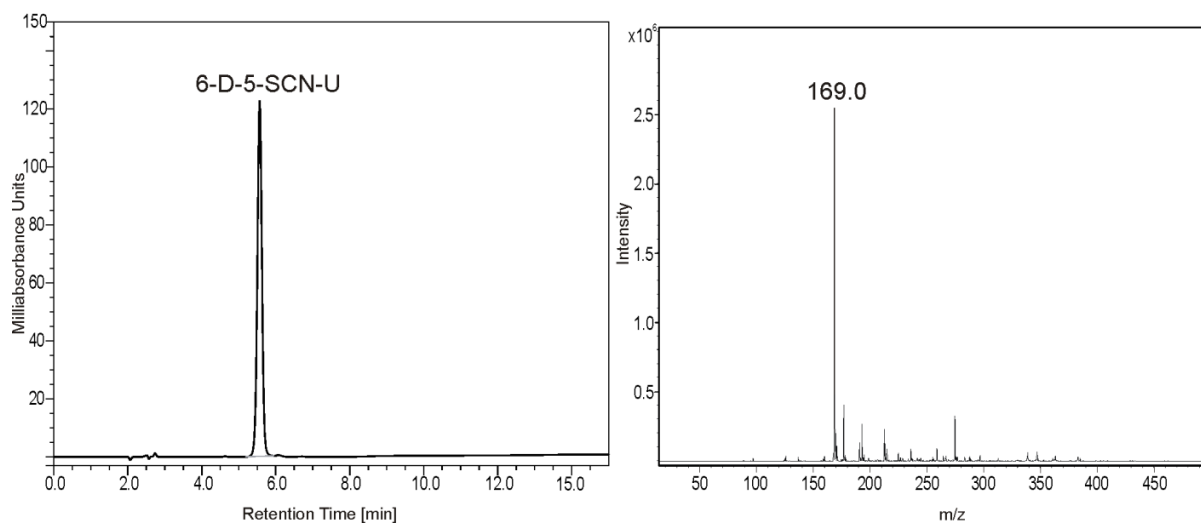

**Figure S7.** HPLC chromatogram and MS spectra (in negative ionization mode) of synthesized and purified 6-deutero-5-thiocyanatouracil (6-D-5-SCNU).

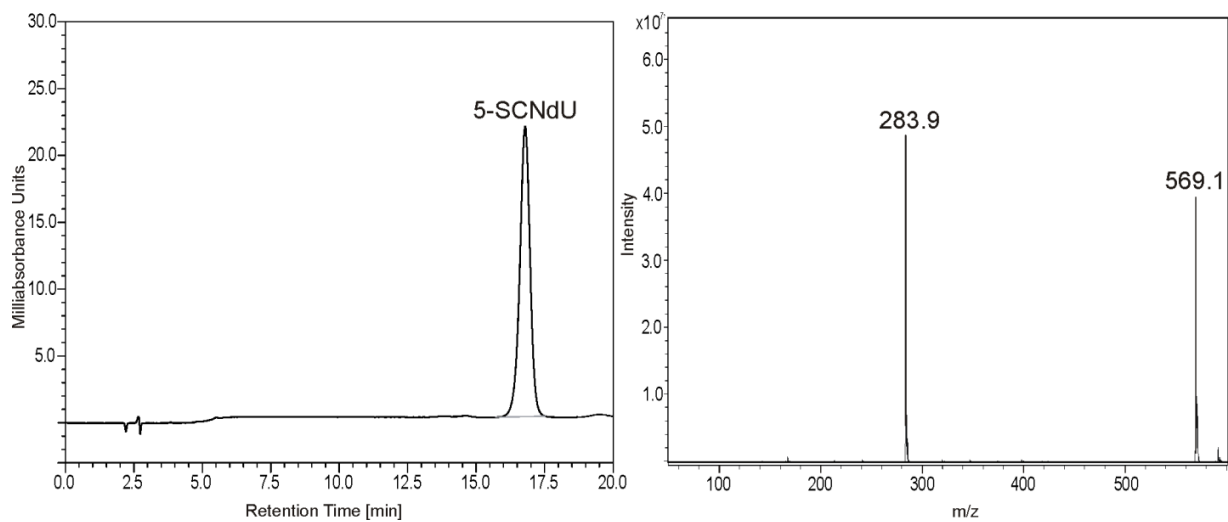

**Figure S8.** HPLC chromatogram and MS spectra (in negative ionization mode) of synthesized and purified 5-thiocyanato-2'-deoxyuridine (SCNdU).

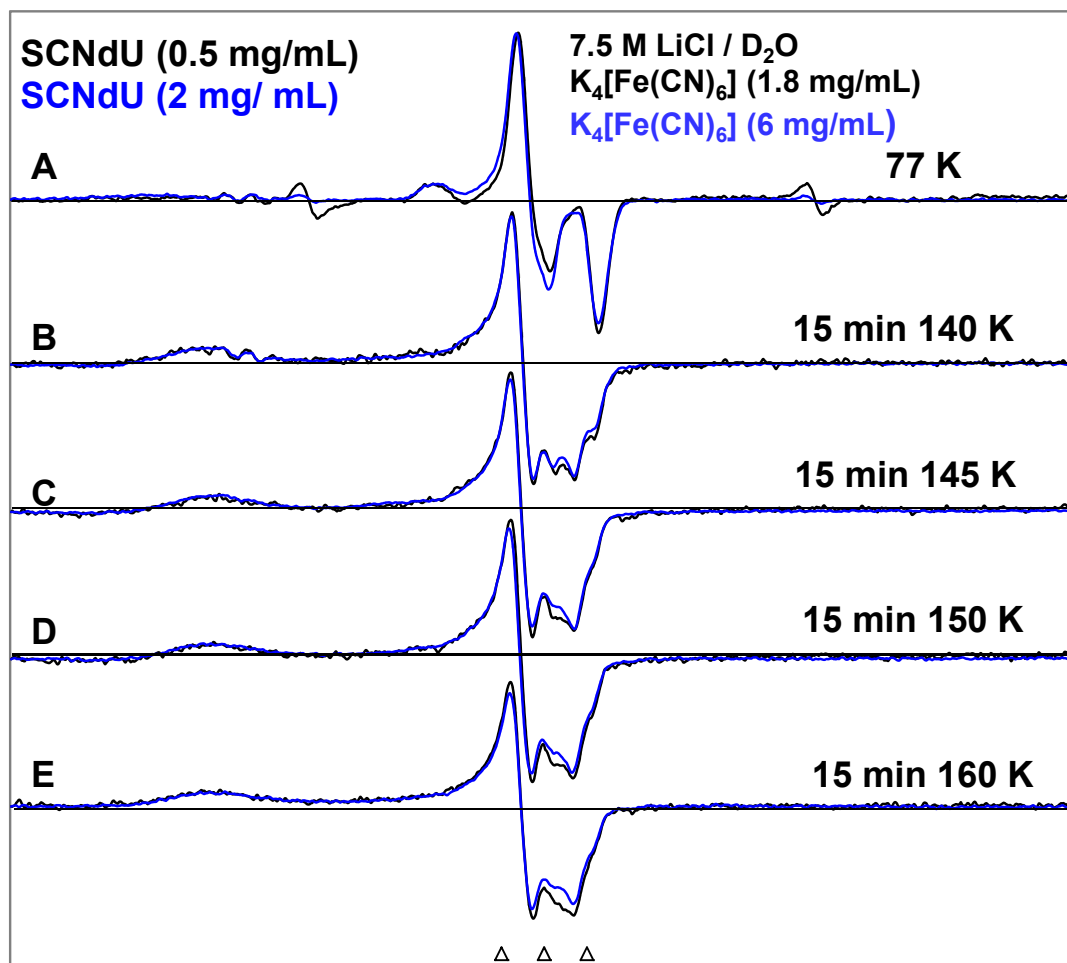

**Figure S9.** ESR spectra recorded at 77 K of matched  $\gamma$ -irradiated (77 K)  $N_2$ -saturated 7.5 M LiCl/D<sub>2</sub>O solutions with two different concentrations of SCNdU (0.5 and 2 mg/mL) with hole scavenger  $K_4[Fe(CN)_6]$  (1.8 and 6 mg/mL). (A) The  $\pi$ -anion radical of SCNdU upon  $e_{pre}^-$  addition. Both spectra show the line components from U-5-S• as well (see Figure 1(A) in the main manuscript). Spectra (B) to (E) were obtained after at 140 to 160 K. Both spectra in Figure (E) are assigned to U-5-S• (see Figure 1 and its discussion in the main manuscript).

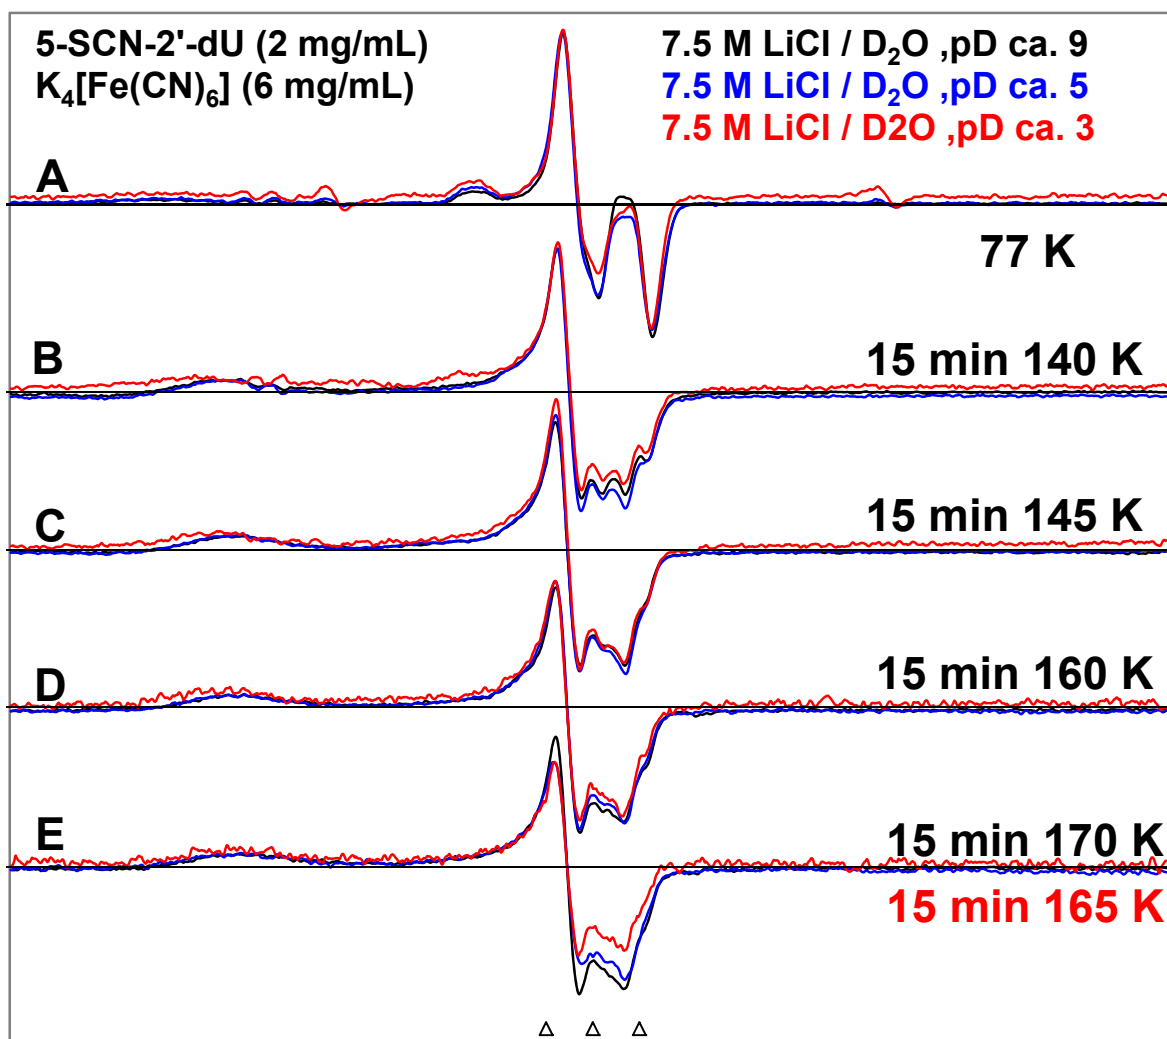

**Figure S10.** ESR spectra recorded at 77 K of matched  $\gamma$ -irradiated (77 K)  $N_2$ -saturated 7.5 M LiCl/D<sub>2</sub>O solutions with pHs ca. 3, 5, and ca. 9 of SCNdU (2 mg/mL) with a hole scavenger  $K_4[Fe(CN)_6]$  (6 mg/mL). (A) The  $\pi$ -anion radical of SCNdU upon  $e_{pre}^-$  addition. Both spectra show the line components from U-5-S $\cdot$  as well (see Figure 1(A) in the main manuscript). Spectra (B) to (E) were obtained after at 140 to 160 K. Both spectra in Figure (E) are assigned to U-5-S $\cdot$  (see Figure 1 and its discussion in the main manuscript).

**Stationary points geometries, calculated at M06-2x/6-31++G(d,p) level, PCM model of water solution. No imaginary frequencies found, with the exception of transition states (p. E and F).**

**A. Neutral forms of SCNdU**

**a) C3'-exo-front neutral SCNdU    E= -1325.92322588    G= -1325.745605**

|   |               |               |               |
|---|---------------|---------------|---------------|
| O | 0.243092473   | 0.199494015   | -0.2445158654 |
| C | -0.1007823416 | 0.215456957   | 1.1088273932  |
| C | 1.1648474031  | 0.5800863382  | 1.9040135063  |
| C | 2.1206999572  | 1.095641215   | 0.8224001503  |
| C | 1.6687032898  | 0.3131607391  | -0.4046150151 |
| N | -0.6313446271 | -1.1325279433 | 1.4881343255  |
| C | -1.1797910597 | -1.228459273  | 2.7606695182  |
| N | -1.6624987512 | -2.4752434339 | 3.0900849918  |
| C | -1.6595244894 | -3.6253623847 | 2.304562451   |
| C | -1.0772070223 | -3.4134564648 | 0.9857431708  |
| C | -0.5914992107 | -2.1922771239 | 0.6396506243  |
| O | -1.2215726435 | -0.275518006  | 3.5195048516  |
| S | -1.0972804208 | -4.7280598039 | -0.1957039967 |
| C | 0.081696338   | -5.7466394846 | 0.5101599383  |
| N | 0.8679088212  | -6.4725272791 | 0.9588310256  |
| O | -2.1033830514 | -4.6780012587 | 2.7338066778  |
| O | 1.9097066555  | 2.4679968766  | 0.5355382367  |
| C | 2.3233846666  | -1.053529547  | -0.5098255066 |

|   |               |               |               |
|---|---------------|---------------|---------------|
| O | 1.6855342716  | -1.7497408119 | -1.5678074226 |
| H | -2.0545668013 | -2.5608481621 | 4.0229372807  |
| H | -0.1462400767 | -1.9990301378 | -0.33389205   |
| H | 1.8291126337  | 0.8764611782  | -1.3271034136 |
| H | 3.1704679143  | 0.9031700798  | 1.0710810211  |
| H | 0.9606628403  | 1.3305451553  | 2.6685890582  |
| H | 1.5766275563  | -0.3042997919 | 2.3981533948  |
| H | -0.923570479  | 0.9153572809  | 1.2665892476  |
| H | 3.392675446   | -0.9154898056 | -0.7086424497 |
| H | 2.2194939403  | -1.6064224156 | 0.4361774646  |
| H | 2.1372029438  | -2.5905577731 | -1.7096646383 |
| H | 2.1440939129  | 2.9911167777  | 1.3123389313  |

**b) C3'-exo-back neutral SCNdU    E= -1325.92309668    G= -1325.745356**

|   |               |               |               |
|---|---------------|---------------|---------------|
| O | 0.2772805227  | 0.3407795499  | -0.2533600208 |
| C | -0.037209587  | 0.170519519   | 1.0968313358  |
| C | 1.2163746267  | 0.5267248699  | 1.913458905   |
| C | 2.1018997698  | 1.2479286825  | 0.8912166484  |
| C | 1.6860128386  | 0.5848607102  | -0.4159510135 |
| N | -0.4647933103 | -1.2472012811 | 1.3179655611  |
| C | -0.9971953251 | -1.5273341053 | 2.5700270586  |
| N | -1.3983770787 | -2.8321045128 | 2.7491173835  |
| C | -1.317477487  | -3.8817003483 | 1.8371994012  |
| C | -0.7473884701 | -3.4821074077 | 0.5570530102  |

|   |               |               |               |
|---|---------------|---------------|---------------|
| C | -0.3660746432 | -2.1940143753 | 0.3490037244  |
| O | -1.0965121124 | -0.674908445  | 3.4355631518  |
| S | -0.4744512167 | -4.7039728498 | -0.6910189473 |
| C | -2.0991600674 | -5.0189511826 | -1.1219455576 |
| N | -3.186790118  | -5.2736379544 | -1.4356086467 |
| O | -1.7151224663 | -4.9977366069 | 2.1301838168  |
| O | 1.7690395966  | 2.6213660461  | 0.7774651356  |
| C | 2.4393396883  | -0.7043955877 | -0.695578128  |
| O | 1.8296544005  | -1.3138506708 | -1.8214776091 |
| H | -1.7915077385 | -3.0484608913 | 3.6601450252  |
| H | 0.0513673813  | -1.8566287851 | -0.5972816067 |
| H | 1.7835164538  | 1.2665387313  | -1.2645684903 |
| H | 3.1696789806  | 1.1178715554  | 1.100497996   |
| H | 0.9764406737  | 1.1559446511  | 2.7712146158  |
| H | 1.7050162131  | -0.3797845955 | 2.2816781879  |
| H | -0.9034137688 | 0.7852488364  | 1.3488304911  |
| H | 3.4905576515  | -0.4627970273 | -0.8914402664 |
| H | 2.3988943623  | -1.3741742179 | 0.1771589571  |
| H | 2.3422769829  | -2.0905401526 | -2.0767195477 |
| H | 1.9926377074  | 3.0683943038  | 1.603443932   |

**c) C3'-endo-front neutral SCNdU    E= -1325.91984651    G= -1325.744085**

|   |              |               |              |
|---|--------------|---------------|--------------|
| C | 0.1321707828 | -0.602177815  | 0.1151669269 |
| N | -0.011052971 | -0.1708340732 | 1.3942139939 |

|   |               |               |               |
|---|---------------|---------------|---------------|
| C | 0.9842689438  | 0.5605314355  | 2.0345244962  |
| N | 2.0915813753  | 0.8303476934  | 1.2619604087  |
| C | 2.3274284255  | 0.4482898241  | -0.056054772  |
| C | 1.2382328834  | -0.3353274235 | -0.6262843344 |
| C | -1.2305377227 | -0.4693187113 | 2.2152138841  |
| O | -1.9979205297 | -1.4210715031 | 1.531632597   |
| C | -3.2814886516 | -0.8802032091 | 1.1711600951  |
| C | -3.0973424984 | 0.6331875531  | 1.2345001893  |
| C | -2.1072447937 | 0.7696754508  | 2.3918358468  |
| O | -4.352827096  | 1.235562851   | 1.4513604247  |
| C | -3.7104019711 | -1.3988879643 | -0.1781734074 |
| O | -3.9477281074 | -2.7910524696 | -0.0682932392 |
| O | 0.8726094277  | 0.934188455   | 3.1887283998  |
| O | 3.3552167455  | 0.770173869   | -0.6285818716 |
| S | 1.4169435855  | -1.0243697706 | -2.2436424659 |
| C | 1.2862005047  | 0.4113826081  | -3.1634058488 |
| N | 1.2124497413  | 1.3622681087  | -3.8240877426 |
| H | 2.8192487764  | 1.3737695751  | 1.7166509428  |
| H | -0.6910591815 | -1.194741975  | -0.2672948112 |
| H | -4.0164338494 | -1.1824300627 | 1.9297766271  |
| H | -2.6510026906 | 0.9958083894  | 0.2966913723  |
| H | -2.6565714826 | 0.689969098   | 3.3351797398  |
| H | -1.533634122  | 1.696769903   | 2.3915030897  |
| H | -0.8597726129 | -0.8812100738 | 3.1545846347  |



|   |               |               |               |
|---|---------------|---------------|---------------|
| H | -4.621815811  | -0.8587649571 | -0.467282935  |
| H | -2.9316984348 | -1.1875851865 | -0.9238572742 |
| H | -4.2318314917 | -3.1296536589 | -0.9255258868 |
| H | -4.2723891839 | 2.1901302208  | 1.3353260485  |

**d) C3'-endo-back neutral SCNdU E= -1325.91984651 G= -1325.744085**

|   |               |               |               |
|---|---------------|---------------|---------------|
| C | 0.1416336663  | -0.5226471753 | 0.3039194551  |
| N | 0.0319630709  | 0.0957111404  | 1.5454362251  |
| C | 1.1237185783  | 0.5427582281  | 2.2172905485  |
| C | 2.3888338883  | 0.3589992989  | 1.7579610059  |
| C | 2.6130241114  | -0.3085844948 | 0.4812538496  |
| N | 1.4315005592  | -0.6941294529 | -0.1462118512 |
| C | -1.3672340431 | 0.2989649297  | 2.048091815   |
| C | -2.0029617727 | -1.0156262898 | 2.4961672969  |
| C | -1.7025674852 | -1.0310982393 | 3.9955171302  |
| C | -1.8016667569 | 0.4516991848  | 4.3399817516  |
| O | -1.3126553153 | 1.1343728432  | 3.1712732807  |
| C | -1.0101271239 | 0.8616945786  | 5.5561126002  |
| O | -1.28067164   | 2.2257902469  | 5.8260103558  |
| O | -2.6343261492 | -1.7424160516 | 4.7785575481  |
| S | 3.7771630167  | 0.85841838    | 2.7313545063  |
| C | 4.3306221491  | 2.1565459     | 1.7651877408  |
| N | 4.7487874254  | 3.0354342721  | 1.1337823984  |
| O | 3.6966307382  | -0.516975615  | -0.0387901451 |

|   |               |               |               |
|---|---------------|---------------|---------------|
| O | -0.8350665913 | -0.8836140434 | -0.3286657783 |
| H | 1.521511302   | -1.1488048441 | -1.0499518521 |
| H | 0.9147450182  | 1.0604982644  | 3.1467251713  |
| H | -2.85853631   | 0.7148915159  | 4.4853089752  |
| H | -0.6813391522 | -1.3927910316 | 4.1856913203  |
| H | -3.0867987776 | -0.9561613882 | 2.3567593685  |
| H | -1.6223239228 | -1.8774830524 | 1.9481198447  |
| H | -1.9044087247 | 0.7884438916  | 1.2340919213  |
| H | -1.3236949735 | 0.2191492564  | 6.3893611131  |
| H | 0.0609081465  | 0.6974560422  | 5.3753186455  |
| H | -0.7940512444 | 2.492106068   | 6.6149280061  |
| H | -2.4464249747 | -2.6868948148 | 4.7184202685  |

## B. Anionradical forms of SCNdU

a) C3'-exo-front anionradical SCNdU    E= -1326.01357383    G= -1325.842517

|   |               |               |               |
|---|---------------|---------------|---------------|
| O | 0.2053110817  | 0.2404859482  | -0.159513996  |
| C | -0.0117946307 | 0.1208185376  | 1.2375154308  |
| C | 1.3775912632  | 0.0977130393  | 1.8879170433  |
| C | 2.2475163182  | 0.8115325526  | 0.8559433599  |
| C | 1.6001403407  | 0.3676667538  | -0.4538280977 |
| N | -0.7972256709 | -1.0847054125 | 1.4976449806  |
| C | -1.6478809036 | -1.0636918626 | 2.5654402431  |
| N | -2.2669512298 | -2.2618440896 | 2.859221149   |
| C | -1.9285217662 | -3.5453262376 | 2.3479548661  |

|   |               |               |               |
|---|---------------|---------------|---------------|
| C | -1.057841362  | -3.4900491821 | 1.2435798577  |
| C | -0.4604079621 | -2.2729426834 | 0.8064281545  |
| O | -1.8704415884 | -0.0527875817 | 3.2416869629  |
| S | -0.6226168511 | -4.9797847813 | 0.4310861794  |
| C | 0.8975058125  | -5.3417703806 | 1.1608842172  |
| N | 1.9274152465  | -5.5787285118 | 1.6458595903  |
| O | -2.4382873588 | -4.5359325697 | 2.9124974155  |
| O | 2.1124543504  | 2.2238380894  | 0.9315828157  |
| C | 2.1890475017  | -0.9373797332 | -0.965123338  |
| O | 1.4153853447  | -1.3613920059 | -2.0751953383 |
| H | -2.8416857238 | -2.2542568601 | 3.6921235262  |
| H | -0.1198302327 | -2.1284719494 | -0.2125897207 |
| H | 1.697600193   | 1.1411359535  | -1.2225906164 |
| H | 3.3024831812  | 0.5184836915  | 0.9127518347  |
| H | 1.3837120451  | 0.5928020073  | 2.8616601847  |
| H | 1.7057576127  | -0.9391340598 | 2.017149887   |
| H | -0.6118403212 | 0.9639310015  | 1.5814315822  |
| H | 3.2317358535  | -0.7547919846 | -1.2563228859 |
| H | 2.1739956171  | -1.6962596899 | -0.1702913636 |
| H | 1.7845884907  | -2.1850193611 | -2.4147963146 |
| H | 2.4697354373  | 2.5263570746  | 1.7759152924  |

**b) C3'-exo-back anionradical SCNdU    E= -1326.01269553    G= -1325.842836**

|   |           |              |               |
|---|-----------|--------------|---------------|
| O | 0.1947594 | 0.3513036891 | -0.1371862629 |
|---|-----------|--------------|---------------|

|   |               |               |               |
|---|---------------|---------------|---------------|
| C | 0.0429761868  | 0.11004238    | 1.2532448754  |
| C | 1.4519965704  | 0.1766179789  | 1.8557230939  |
| C | 2.2061642426  | 1.0549390287  | 0.8606386547  |
| C | 1.5543665305  | 0.6569303676  | -0.4621766416 |
| N | -0.6117361076 | -1.1819852042 | 1.4445231197  |
| C | -1.4517494536 | -1.3136755933 | 2.5137349431  |
| N | -1.9423936634 | -2.5832508172 | 2.7343679577  |
| C | -1.5361938103 | -3.7873558567 | 2.0969566193  |
| C | -0.6320631523 | -3.580787349  | 1.0395558534  |
| C | -0.1620966857 | -2.283645049  | 0.6762687042  |
| O | -1.7704651641 | -0.3744063157 | 3.2521004638  |
| S | -0.0485721533 | -4.9700047533 | 0.1427755947  |
| C | -1.2366852308 | -5.1033065259 | -1.0956707505 |
| N | -2.0348633604 | -5.2144994938 | -1.9335614032 |
| O | -2.0228979169 | -4.8532648606 | 2.5312963215  |
| O | 1.9361918892  | 2.4360418193  | 1.0598920953  |
| C | 2.255856009   | -0.5264569857 | -1.1086170984 |
| O | 1.4927873117  | -0.9261015889 | -2.2348558259 |
| H | -2.5355450407 | -2.68423413   | 3.5477032701  |
| H | 0.1383730276  | -2.0395836822 | -0.3365727128 |
| H | 1.5373700021  | 1.5001749196  | -1.1601867814 |
| H | 3.2865694971  | 0.8673376746  | 0.8602617434  |
| H | 1.4485549865  | 0.5907566183  | 2.8665697126  |
| H | 1.8856194827  | -0.8283104637 | 1.8872846712  |

|   |               |               |               |
|---|---------------|---------------|---------------|
| H | -0.6218699991 | 0.8622405876  | 1.6788395304  |
| H | 3.2642276577  | -0.2097815621 | -1.4060485271 |
| H | 2.3450369128  | -1.3522106321 | -0.3891987396 |
| H | 1.9358943294  | -1.6673539454 | -2.6643196395 |
| H | 2.2649021623  | 2.6957062033  | 1.9297616618  |

**c) C3'-endo-front anionradical SCNdU    E= -1326.01289481    G= -1325.843165**

|   |               |               |               |
|---|---------------|---------------|---------------|
| C | 0.0538234146  | -0.1801393355 | 0.0224169614  |
| N | 0.049235532   | -0.1797083674 | 1.4387566062  |
| C | 1.1851318554  | -0.0095324881 | 2.1843574802  |
| N | 2.3563387966  | 0.0931005216  | 1.4651816177  |
| C | 2.5046204183  | 0.1839868541  | 0.055273373   |
| C | 1.304614548   | -0.0400683007 | -0.6457622118 |
| C | -1.2376567647 | -0.16159513   | 2.1161790666  |
| O | -1.9866261369 | -1.2964187974 | 1.6834854332  |
| C | -3.280475873  | -0.9084855898 | 1.2310475942  |
| C | -3.144428899  | 0.5535536277  | 0.8061146228  |
| C | -2.0952232862 | 1.0732012289  | 1.7887353534  |
| O | -4.4137189119 | 1.1694802984  | 0.9100503101  |
| C | -3.7315181197 | -1.8178366541 | 0.1147034756  |
| O | -3.9898183923 | -3.1054237893 | 0.6514411123  |
| O | 1.1953949843  | 0.0571188095  | 3.4174303975  |
| O | 3.6463094354  | 0.4336792353  | -0.3830680302 |
| S | 1.3356380458  | -0.0630695293 | -2.3958030567 |

|   |               |               |               |
|---|---------------|---------------|---------------|
| C | 0.9044304161  | 1.5623949298  | -2.7780659567 |
| N | 0.6136997487  | 2.6576744674  | -3.0383031569 |
| H | 3.1881618266  | 0.2646775764  | 2.0151610903  |
| H | -0.7666339097 | -0.724768009  | -0.4323986397 |
| H | -4.0014283573 | -0.9639064908 | 2.0616434904  |
| H | -2.7754991735 | 0.6131821003  | -0.2272779415 |
| H | -2.6105589567 | 1.4134357554  | 2.6920829705  |
| H | -1.487703003  | 1.8889823342  | 1.3919216254  |
| H | -1.0231859167 | -0.2456832314 | 3.1807094435  |
| H | -4.6373883991 | -1.3868782512 | -0.3320640405 |
| H | -2.9450123893 | -1.8610061309 | -0.651510524  |
| H | -4.2983419616 | -3.6833617043 | -0.0562698306 |
| H | -4.3785825813 | 2.0378402415  | 0.4913564921  |

**d) C3'-endo-back anionradical SCNdU    E= -1326.01214721    G= -1325.843283**

|   |               |               |               |
|---|---------------|---------------|---------------|
| C | -0.028389197  | 0.0251410293  | -0.0089172158 |
| N | -0.0681710134 | 0.0347604708  | 1.3602528128  |
| C | 1.094447834   | -0.0612866542 | 2.1645733856  |
| C | 2.3544914496  | -0.1845750448 | 1.5079073242  |
| C | 2.4730944297  | -0.1906013735 | 0.106632462   |
| N | 1.2309900853  | -0.0296367779 | -0.5646125554 |
| C | -1.3606301295 | -0.0337252451 | 2.0209496673  |
| C | -1.5933651724 | -1.3399629489 | 2.8006602755  |
| C | -1.404657691  | -0.9426085033 | 4.2645717785  |

|   |               |               |               |
|---|---------------|---------------|---------------|
| C | -1.8327299688 | 0.5242983225  | 4.2499577804  |
| O | -1.427940184  | 1.0228310739  | 2.9794841111  |
| C | -1.204193496  | 1.3442053727  | 5.3492958554  |
| O | -1.782094406  | 2.6400282027  | 5.3398025622  |
| O | -2.2232846682 | -1.6427841857 | 5.1817360229  |
| S | 3.7991288349  | -0.3799773524 | 2.4813160253  |
| C | 4.3244879368  | 1.2494703812  | 2.6529611504  |
| N | 4.7051082678  | 2.3414630313  | 2.7715434303  |
| O | 3.4938985512  | -0.3048120707 | -0.6043347678 |
| O | -1.0324409917 | 0.0573036321  | -0.7273464034 |
| H | 1.2588530614  | -0.062647698  | -1.5753795144 |
| H | 1.0087676746  | 0.3979244607  | 3.144091174   |
| H | -2.9295154129 | 0.5684857068  | 4.3415785134  |
| H | -0.3487890024 | -1.0221565577 | 4.5578671818  |
| H | -2.6279563285 | -1.6702089832 | 2.6667329733  |
| H | -0.9174671221 | -2.1304473286 | 2.4686015276  |
| H | -2.1099781264 | 0.124077569   | 1.246307892   |
| H | -1.3905737545 | 0.8351145875  | 6.3042745873  |
| H | -0.1195751062 | 1.3956021273  | 5.180499245   |
| H | -1.3797709501 | 3.1670541335  | 6.0399610955  |
| H | -1.8455586912 | -2.5166218291 | 5.3380341393  |

### C. Anionradical complex-1 forms of SCNdU

a) C3'-exo-front complex-1    E= -1326.01603195    G= -1325.845063

|   |               |               |               |
|---|---------------|---------------|---------------|
| C | 0.1411231721  | -0.1178424904 | 0.0221257944  |
| N | 0.0195638986  | 0.0737294576  | 1.3846189033  |
| C | 1.1270279475  | 0.2455517804  | 2.1898419399  |
| N | 2.3454606941  | 0.1581822031  | 1.5446582367  |
| C | 2.5845749438  | -0.0308558153 | 0.177153103   |
| C | 1.3495374191  | -0.1672155664 | -0.5484582165 |
| C | -1.3038532888 | 0.1923122129  | 2.0496918544  |
| O | -2.2813771637 | -0.3689667608 | 1.2159792704  |
| C | -3.2917618067 | 0.6006190414  | 0.8853100534  |
| C | -3.2044572514 | 1.6428638575  | 1.9944926587  |
| C | -1.7072947398 | 1.6514273026  | 2.3050233129  |
| O | -3.9673834907 | 1.1523464667  | 3.0866381399  |
| C | -3.0655153816 | 1.1755352423  | -0.5046558877 |
| O | -3.0746261428 | 0.1226262858  | -1.4414335133 |
| O | 1.0390959391  | 0.4608678256  | 3.3920529888  |
| O | 3.7278313292  | -0.0657448066 | -0.2551762053 |
| S | 1.798716488   | 0.7399227824  | -3.8364991662 |
| C | 0.2068720484  | 0.7295013303  | -3.3764258692 |
| N | -0.9197311407 | 0.7232449662  | -3.0452273383 |
| H | 3.1595995798  | 0.2817546758  | 2.139185363   |
| H | -0.790840607  | -0.2385190845 | -0.523424654  |
| H | -4.2503068651 | 0.0741622896  | 0.9132442923  |
| H | -3.5711531775 | 2.6231762658  | 1.6696278382  |
| H | -1.4894036555 | 1.96462341    | 3.3273824371  |



|   |               |               |              |
|---|---------------|---------------|--------------|
| H | -1.1746026482 | 2.317315745   | 1.6188871107 |
| H | -1.2271129731 | -0.3878797099 | 2.9713976217 |
| H | -3.8654262705 | 1.8997340774  | -0.714010327 |
| H | -2.1082838752 | 1.7187504574  | -0.540013034 |
| H | -2.3947108645 | 0.3139217214  | -2.122726643 |
| H | -3.9000295743 | 1.7756392733  | 3.8209029519 |

**b) C3'-exo-back complex-1    E= -1326.00632630    G= -1325.835951**

|   |               |               |               |
|---|---------------|---------------|---------------|
| C | -0.0701245998 | -0.3072207166 | -0.0810082313 |
| N | -0.0732943566 | 0.0323406603  | 1.267376211   |
| C | 1.0853872926  | 0.3724799397  | 1.9208521131  |
| N | 2.224279414   | 0.3440781887  | 1.1450074527  |
| C | 2.3207512566  | 0.0387050622  | -0.2222537658 |
| C | 1.053118446   | -0.3123371263 | -0.8171731727 |
| C | -1.3148216534 | 0.0842576773  | 2.0820357212  |
| O | -2.3671308414 | -0.5035419523 | 1.3637875537  |
| C | -3.3600087819 | 0.4776185339  | 1.0278935671  |
| C | -3.2425254047 | 1.5270051356  | 2.1272606053  |
| C | -1.7382183541 | 1.5274309127  | 2.4095457481  |
| O | -3.9943245056 | 1.0496220232  | 3.232657146   |
| C | -3.1330185867 | 1.0493785286  | -0.3611863581 |
| O | -3.1444954593 | -0.0348016581 | -1.2742915483 |
| O | 1.1077053536  | 0.6830589521  | 3.10995694    |
| O | 3.4202162061  | 0.0900947414  | -0.7675363227 |

|   |               |               |               |
|---|---------------|---------------|---------------|
| S | 0.6747255723  | -0.8226600509 | -3.3431621316 |
| C | 1.4451237091  | -2.2989906394 | -3.2255271337 |
| N | 1.988970918   | -3.3327684253 | -3.1323464653 |
| H | 3.0823639298  | 0.5978686766  | 1.6245876887  |
| H | -1.0463595841 | -0.569780537  | -0.4799638279 |
| H | -4.3263015179 | -0.033137397  | 1.0625588261  |
| H | -3.6073071032 | 2.5082385501  | 1.8026990896  |
| H | -1.5076706833 | 1.7953105797  | 3.4415541692  |
| H | -1.2219153001 | 2.2330145604  | 1.751783126   |
| H | -1.1207777758 | -0.5089056282 | 2.9781868542  |
| H | -3.9350343853 | 1.7642131601  | -0.5818646957 |
| H | -2.172598463  | 1.5845584817  | -0.4052448775 |
| H | -3.0246746129 | 0.305052495   | -2.1692343718 |
| H | -3.8851225026 | 1.6589551026  | 3.9736120503  |

**c) C3'-endo-front complex-1    E= -1326.00683113    G= -1325.839459**

|   |               |               |               |
|---|---------------|---------------|---------------|
| C | -0.1427217279 | -0.0174207041 | -0.0146301288 |
| C | -0.0829292365 | 0.0371997942  | 1.5189294998  |
| O | 1.2842396785  | 0.1671035989  | 1.8673860402  |
| C | 2.1168393622  | 0.1275514674  | 0.705673132   |
| C | 1.2143538699  | 0.5365445738  | -0.4581158857 |
| N | -0.8070554656 | 1.176898608   | 2.0964526046  |
| C | -0.3433188263 | 2.470690474   | 1.8778340377  |
| C | -0.9693638818 | 3.5602081191  | 2.3365246925  |

|   |               |               |               |
|---|---------------|---------------|---------------|
| C | -2.1842732501 | 3.4269691484  | 3.1080183138  |
| N | -2.571130857  | 2.091543618   | 3.2967941335  |
| C | -1.9571856425 | 0.9495606498  | 2.8202434006  |
| O | -2.4214826734 | -0.1656618912 | 3.0339866306  |
| O | -2.8684396115 | 4.3242807903  | 3.5883384917  |
| S | 0.1625839445  | 5.8487445869  | 1.5439090213  |
| C | 1.1036182724  | 4.914636781   | 0.5352658867  |
| N | 1.7509027724  | 4.2241688043  | -0.1580938481 |
| C | 3.3028083273  | 1.0411427508  | 0.8915536055  |
| O | 4.1583324618  | 0.4785684657  | 1.8734083726  |
| O | 1.7211293341  | -0.0394207701 | -1.6452515924 |
| H | -3.4210644659 | 1.9298759249  | 3.828270853   |
| H | 0.5828304415  | 2.5279661473  | 1.3120478325  |
| H | 2.4651081509  | -0.902311965  | 0.5368280242  |
| H | 1.195490218   | 1.6316953275  | -0.5506925264 |
| H | -0.2051947316 | -1.0602160296 | -0.3397100959 |
| H | -1.0006727892 | 0.5284371801  | -0.411526862  |
| H | -0.5119292448 | -0.8483302373 | 1.9865889756  |
| H | 3.8154383681  | 1.1326142602  | -0.0758737378 |
| H | 2.946390058   | 2.035565182   | 1.1932295809  |
| H | 4.9007466255  | 1.0761412641  | 2.0206599852  |
| H | 1.3098327367  | 0.3894544805  | -2.4050831214 |

**d) C3'-endo-front complex-1    E= -1326.00433386    G= -1325.835415**

|   |               |               |               |
|---|---------------|---------------|---------------|
| O | -0.0058031361 | -0.0576061519 | -0.0344879399 |
| C | -0.0250034565 | -0.035308514  | 1.3722739209  |
| C | 1.4329387203  | -0.027124303  | 1.8323210274  |
| C | 2.1487346665  | -0.6901092607 | 0.6554156474  |
| C | 1.3387152714  | -0.1610696265 | -0.5255014361 |
| N | -0.7593995894 | -1.2324047737 | 1.8593323901  |
| C | -1.1732621266 | -1.1893363323 | 3.1696442971  |
| N | -1.8423072299 | -2.311427073  | 3.6082051967  |
| C | -2.1202495169 | -3.4817668717 | 2.8846551751  |
| C | -1.6447387722 | -3.4370944187 | 1.5212239053  |
| C | -1.0064694185 | -2.3473898568 | 1.0664420118  |
| O | -0.9615027683 | -0.2254524589 | 3.9017350798  |
| S | -1.9111196349 | -5.3327691392 | -0.2125130093 |
| C | -3.5580293882 | -5.0853550035 | -0.3282047903 |
| N | -4.713459556  | -4.905049177  | -0.4019257678 |
| O | -2.7189773501 | -4.3974499667 | 3.4421895673  |
| O | 3.4979932154  | -0.3137937318 | 0.4891637529  |
| C | 1.3889528597  | -1.0404519013 | -1.7501370472 |
| O | 0.7089553545  | -0.3817034521 | -2.8049380656 |
| H | -2.150975672  | -2.2799537622 | 4.5748882527  |
| H | -0.657337858  | -2.2492946872 | 0.0442632844  |
| H | 1.7037434934  | 0.8433059113  | -0.7840176753 |
| H | 2.0573064897  | -1.7852655785 | 0.7092960947  |
| H | 1.785368488   | 1.0057002534  | 1.9176874643  |

|   |               |               |               |
|---|---------------|---------------|---------------|
| H | 1.5719881084  | -0.5324578719 | 2.788882927   |
| H | -0.5889198137 | 0.8292333644  | 1.7258948809  |
| H | 2.4456248751  | -1.2058659569 | -1.9996968265 |
| H | 0.9286349829  | -2.0128068832 | -1.5279764585 |
| H | 0.7313759166  | -0.9416977495 | -3.5898840365 |
| H | 4.0406284023  | -0.7797602037 | 1.1368920462  |

#### D. Anionradical complex-2 forms of SCNdU

a) C3'-exo-front complex-2    E= -1326.04018073    G= -1325.868348

|   |               |               |               |
|---|---------------|---------------|---------------|
| C | 0.1271178858  | -0.3047745752 | 0.1390288942  |
| N | 0.0115475111  | 0.0165220909  | 1.4408447292  |
| C | 1.1235181806  | 0.2791865147  | 2.2448035419  |
| N | 2.3313028375  | 0.2077855213  | 1.5969784202  |
| C | 2.5705301671  | -0.0943294661 | 0.2563923289  |
| C | 1.3461352502  | -0.3773138101 | -0.524858326  |
| C | -1.3184150099 | 0.0796188881  | 2.1367063636  |
| O | -2.3061807559 | -0.3766028573 | 1.2676045064  |
| C | -3.1553645115 | 0.7147569156  | 0.8595864405  |
| C | -3.12704836   | 1.6634284206  | 2.0509699687  |
| C | -1.682040261  | 1.519760774   | 2.542827784   |
| O | -4.0619652132 | 1.1711215975  | 2.997139765   |
| C | -2.6558965575 | 1.355299266   | -0.4248974702 |
| O | -2.5527230673 | 0.361851009   | -1.4152373597 |
| O | 1.0087836387  | 0.5499965387  | 3.4257169859  |

|   |               |               |               |
|---|---------------|---------------|---------------|
| O | 3.7115769212  | -0.1109648573 | -0.1655808487 |
| S | 1.4231603221  | -0.7878925784 | -2.1674949619 |
| C | -1.1725932411 | 2.3828549566  | -4.4223859478 |
| N | -1.6304905452 | 1.7435767326  | -3.5503682124 |
| H | 3.1462041751  | 0.4021407449  | 2.1711782997  |
| H | -0.8058294816 | -0.4972645048 | -0.3872702589 |
| H | -4.1485338207 | 0.2856114595  | 0.7042767496  |
| H | -3.3662517956 | 2.69315519    | 1.7622908368  |
| H | -1.5924311893 | 1.6698022713  | 3.6193141928  |
| H | -1.0281880847 | 2.2397957236  | 2.0427638732  |
| H | -1.2363266714 | -0.6002895497 | 2.986641941   |
| H | -3.36454388   | 2.1450709353  | -0.7122049403 |
| H | -1.6800747874 | 1.8405056251  | -0.2489948255 |
| H | -2.225190039  | 0.8075859304  | -2.2417221239 |
| H | -4.0402393327 | 1.7333371459  | 3.7816313091  |

**b) C3'-exo-back complex-2    E= -1326.03362814    G= -1325.862149**

|   |               |               |               |
|---|---------------|---------------|---------------|
| C | -0.099053839  | -0.0269901893 | -0.5631964096 |
| N | -0.0689207284 | 0.0134809179  | 0.7761765381  |
| C | 1.1273526685  | 0.1357781597  | 1.4873343809  |
| N | 2.2443491454  | 0.312955647   | 0.7111312295  |
| C | 2.3352303306  | 0.2518822234  | -0.6762731208 |
| C | 1.0325722808  | 0.1083343339  | -1.361063072  |
| C | -1.2762302983 | -0.2762037344 | 1.614369252   |

|   |               |               |               |
|---|---------------|---------------|---------------|
| O | -2.3475490999 | -0.5955037186 | 0.7772567426  |
| C | -3.3289059462 | 0.4551892589  | 0.7980586781  |
| C | -3.1985886399 | 1.0578076339  | 2.1915308721  |
| C | -1.6928441916 | 0.9435480923  | 2.4548808985  |
| O | -3.9572629994 | 0.2384011001  | 3.0658335107  |
| C | -3.0828230565 | 1.4629158055  | -0.3116513561 |
| O | -3.0743264671 | 0.7488473211  | -1.5366265689 |
| O | 1.1519247475  | 0.1195981157  | 2.7041362477  |
| O | 3.4236682814  | 0.332006107   | -1.2178420282 |
| S | 0.9207361185  | 0.0651458035  | -3.0497383331 |
| C | 1.5366129609  | -2.9410345858 | 0.2388769025  |
| N | 0.6932042363  | -2.8899877438 | 1.0575221885  |
| H | 3.1201206653  | 0.3828627239  | 1.2200052654  |
| H | -1.0789902572 | -0.1715022588 | -1.0101928229 |
| H | -4.2993824149 | -0.0266683394 | 0.6556604088  |
| H | -3.5482454048 | 2.0959021177  | 2.2268012862  |
| H | -1.4682939646 | 0.7991601722  | 3.512408717   |
| H | -1.1702470249 | 1.8427597266  | 2.1174605064  |
| H | -1.0027669031 | -1.1547385197 | 2.2013859496  |
| H | -3.8831210687 | 2.2120507177  | -0.2915925196 |
| H | -2.1240852117 | 1.9811834052  | -0.1571267629 |
| H | -2.9682095366 | 1.3725544432  | -2.2651892573 |
| H | -3.8509182701 | 0.5624659432  | 3.9689830523  |

**c) C3'-endo-front complex-2    E= -1326.03839646    G= -1325.868186**

|   |               |               |               |
|---|---------------|---------------|---------------|
| C | -0.2190803881 | -0.1901883707 | 0.2966910792  |
| C | 0.0613312461  | -0.0093589878 | 1.7865009711  |
| O | 1.4165613418  | 0.3089328323  | 1.9181643576  |
| C | 2.0356836661  | 0.427290297   | 0.6201701104  |
| C | 0.8724064285  | 0.6574884811  | -0.3509278827 |
| N | -0.7471303574 | 1.1245552607  | 2.3584428137  |
| C | -0.201480637  | 2.3083125185  | 2.6867071368  |
| C | -0.9229769576 | 3.376556286   | 3.2036623943  |
| C | -2.3750785729 | 3.1791232751  | 3.410940951   |
| N | -2.8312180003 | 1.9089684346  | 3.0605863513  |
| C | -2.1077757038 | 0.8591781588  | 2.551003712   |
| O | -2.5943213466 | -0.2221170941 | 2.2805716403  |
| O | -3.1537282883 | 4.0047609086  | 3.8484124131  |
| S | -0.1683401658 | 4.8426593181  | 3.5902220706  |
| C | 2.4512719999  | 3.5811030605  | -3.1003613695 |
| N | 2.0768080251  | 2.5280724651  | -2.7402891337 |
| C | 3.0619983542  | 1.5297174507  | 0.6247316873  |
| O | 4.1333572474  | 1.1526365302  | 1.4738685039  |
| O | 1.1529700421  | 0.253006573   | -1.6586919675 |
| H | -3.8215520035 | 1.7295896121  | 3.1980389993  |
| H | 0.8686541166  | 2.3844814552  | 2.5342082006  |
| H | 2.5203228649  | -0.5279738688 | 0.3760959467  |
| H | 0.5920558606  | 1.7242022177  | -0.3295895938 |



|   |               |               |               |
|---|---------------|---------------|---------------|
| H | -0.0555960198 | -1.2383923079 | 0.0263007596  |
| H | -1.2338654589 | 0.0920000445  | 0.0159438176  |
| H | -0.1896273803 | -0.8788228735 | 2.3954902614  |
| H | 3.3992658328  | 1.6734713276  | -0.4107452897 |
| H | 2.5979985487  | 2.4666316208  | 0.9650970547  |
| H | 4.809677708   | 1.8395641532  | 1.4487316037  |
| H | 1.5152663638  | 1.0469274244  | -2.1397557664 |

**d) C3'-endo-back complex-2    E= -1326.02910139    G= -1325.861071**

|   |               |               |              |
|---|---------------|---------------|--------------|
| C | 0.0477848922  | -0.4496999985 | 1.0592397565 |
| C | 0.3924698738  | 0.5078921869  | 2.197041139  |
| O | 1.7555095219  | 0.8032599253  | 2.0823431952 |
| C | 2.3103581299  | 0.2240131944  | 0.8878752707 |
| C | 1.1044232877  | -0.0999043162 | 0.0105398364 |
| N | -0.3846564021 | 1.7871323063  | 2.0983535284 |
| C | 0.2074034328  | 2.9750445388  | 1.9174160969 |
| C | -0.4623385639 | 4.1922023084  | 1.9697265378 |
| C | -1.9054263579 | 4.1587963208  | 2.2913057927 |
| N | -2.4162790926 | 2.877970094   | 2.4730611606 |
| C | -1.7306517228 | 1.6894705891  | 2.4686198068 |
| O | -2.2492959721 | 0.6194531527  | 2.7248842197 |
| O | -2.6366915378 | 5.1273367534  | 2.3970433239 |
| S | 0.3507221449  | 5.6537892513  | 1.7040318152 |
| C | -0.4050379003 | 2.2749633569  | 5.1977603989 |

|   |               |               |               |
|---|---------------|---------------|---------------|
| N | -0.3485579689 | 2.214245807   | 6.37086505    |
| C | 3.298212106   | 1.1722427551  | 0.255830582   |
| O | 4.4162269742  | 1.2942039424  | 1.1174249775  |
| O | 1.4469359377  | -1.1533431139 | -0.8619986654 |
| H | -3.3951273453 | 2.8128440443  | 2.735221176   |
| H | 1.2741602871  | 2.9427297222  | 1.730620296   |
| H | 2.8195250096  | -0.7118659399 | 1.155472685   |
| H | 0.8048424916  | 0.7921008288  | -0.5594546213 |
| H | 0.212239628   | -1.4782735884 | 1.39529852    |
| H | -0.981133342  | -0.3479060434 | 0.7149515751  |
| H | 0.169139591   | 0.122668463   | 3.1942573705  |
| H | 3.5874730783  | 0.7540527136  | -0.7176426556 |
| H | 2.8186332514  | 2.1461802082  | 0.0868142886  |
| H | 5.0578801557  | 1.892200565   | 0.7164926914  |
| H | 0.7545106624  | -1.2546951881 | -1.5264650818 |

**E. Transition state between anionradical and complex-1 forms of SCNdU (TS-1); one imaginary frequency found, abstracting SCN<sup>-</sup>**

**a) C3'-exo-front TS-1    E= -1326.00014741    G= -1325.828665**

|   |              |               |               |
|---|--------------|---------------|---------------|
| C | 0.0544798946 | -0.3753804289 | 0.0299829978  |
| N | 0.033296293  | -0.0900503456 | 1.4052474131  |
| C | 1.1862514404 | -0.0167739807 | 2.1313058065  |
| N | 2.3430942181 | -0.222084205  | 1.398020566   |
| C | 2.4610726554 | -0.1363747672 | -0.0001535518 |

|   |               |               |               |
|---|---------------|---------------|---------------|
| C | 1.2165578845  | -0.375853934  | -0.6949505641 |
| C | -1.2173574587 | 0.3018525764  | 2.0702292688  |
| O | -2.2951604439 | -0.3986834555 | 1.4829424009  |
| C | -3.2952468775 | 0.5087095503  | 1.0008527377  |
| C | -3.0502579212 | 1.8082801432  | 1.7628922842  |
| C | -1.5298949436 | 1.795613144   | 1.9104993473  |
| O | -3.7098910289 | 1.6890924123  | 3.0149962781  |
| C | -3.1993146605 | 0.7045730967  | -0.5038755551 |
| O | -3.2417966065 | -0.5759371507 | -1.1138223189 |
| O | 1.226164989   | 0.2171802715  | 3.3417841501  |
| O | 3.5760551876  | 0.0672431334  | -0.4835764603 |
| S | 1.1583450042  | 0.506468857   | -2.561208116  |
| C | 0.3013711164  | 1.8985640585  | -2.184755112  |
| N | -0.3344322772 | 2.7942155606  | -1.7762346224 |
| H | 3.2024787228  | -0.1357486435 | 1.9300994917  |
| H | -0.9166513539 | -0.6277899942 | -0.3838502512 |
| H | -4.2665552168 | 0.0756660657  | 1.2588549653  |
| H | -3.4138558487 | 2.6833266501  | 1.2114140378  |
| H | -1.1803302831 | 2.3841596694  | 2.7613932844  |
| H | -1.056119544  | 2.178179722   | 0.9993145284  |
| H | -1.1169923387 | 0.0062736245  | 3.1156590118  |
| H | -4.0482247035 | 1.3226970927  | -0.8239321015 |
| H | -2.2704541341 | 1.2301399589  | -0.7678814456 |
| H | -3.1911648009 | -0.4665693333 | -2.0708879398 |

H -3.531511346 2.480000282 3.5392758961

**b) C3'-exo-back TS-1 E= -1325.99735881 G= -1325.825794**

C -0.5246572235 0.0656456779 -0.3681543784  
N 0.4395590511 1.0871355059 -0.4855631778  
C 0.0682058407 2.3962772064 -0.6034068521  
N -1.2979880536 2.6158764835 -0.5329097208  
C -2.2481037532 1.7230291161 -0.0020828464  
C -1.8352091732 0.3442255844 -0.0866034935  
C 1.8668186254 0.7701244739 -0.4149468495  
O 2.1102638796 -0.4313648572 -1.1259205831  
C 2.8056148509 -1.3809214569 -0.3094786696  
C 3.4106573105 -0.564902048 0.8304163581  
C 2.3615508327 0.529562655 1.016371743  
O 4.6454438757 -0.0426592904 0.3622101259  
C 1.8725412489 -2.4668985086 0.2030209878  
O 1.1939178894 -3.0220118188 -0.9099047442  
O 0.8582361084 3.3309557709 -0.7549650394  
O -3.3173579212 2.1776735015 0.4104136063  
S -2.7763618571 -0.8433409781 1.3275561764  
C -4.2257664809 -1.1366170718 0.531351663  
N -5.2278774054 -1.3349999776 -0.0346475433  
H -1.5707074263 3.5917654237 -0.5775858375  
H -0.1458921111 -0.9281916197 -0.5841429925

|   |              |               |               |
|---|--------------|---------------|---------------|
| H | 3.5867078891 | -1.8281656637 | -0.9317278724 |
| H | 3.5596924873 | -1.1684707402 | 1.7334801297  |
| H | 2.7682276891 | 1.4356808915  | 1.4704325971  |
| H | 1.5363557377 | 0.1689369903  | 1.6393526666  |
| H | 2.3906303531 | 1.5939669313  | -0.901773027  |
| H | 2.4759180781 | -3.2238426799 | 0.7202350681  |
| H | 1.155486232  | -2.0474642044 | 0.9238155832  |
| H | 0.6487354923 | -3.7580486049 | -0.6076882159 |
| H | 5.0356642312 | 0.5058400013  | 1.0544252759  |

**c) C3'-endo-front TS-1 E=-1325.99797433 G=-1325.829065**

|   |               |               |               |
|---|---------------|---------------|---------------|
| C | 0.0164057638  | 0.2614552252  | -0.015442552  |
| N | -0.0068679727 | 0.1258270934  | 1.3837965194  |
| C | 1.1366773205  | -0.1605114929 | 2.0794410604  |
| N | 2.2820884989  | -0.2083848854 | 1.3018601506  |
| C | 2.4277801662  | 0.3070527645  | 0.0015340348  |
| C | 1.1798592916  | 0.3882069961  | -0.7206715013 |
| C | -1.2433615522 | 0.3892415918  | 2.1155236807  |
| O | -2.2761471005 | -0.4109944013 | 1.5506218365  |
| C | -3.4086723405 | 0.3932123893  | 1.2185542584  |
| C | -2.844426124  | 1.8008113784  | 0.9869817247  |
| C | -1.7110142389 | 1.8479515174  | 2.0041459639  |
| O | -3.7843362578 | 2.8251474539  | 1.2472260168  |
| C | -4.1107694247 | -0.1947882956 | 0.0196230871  |

|   |               |               |               |
|---|---------------|---------------|---------------|
| O | -4.699702428  | -1.4279747942 | 0.3978680551  |
| O | 1.1839133995  | -0.358169173  | 3.2940677941  |
| O | 3.560445457   | 0.5697504288  | -0.4050344447 |
| S | 1.2241951732  | 1.7747666532  | -2.2601837441 |
| C | 0.2727311402  | 2.9722179126  | -1.5727164887 |
| N | -0.4377167988 | 3.6956579347  | -0.9868074467 |
| H | 3.1371974581  | -0.3791868849 | 1.820216147   |
| H | -0.962217308  | 0.2126518134  | -0.4818957198 |
| H | -4.1036649838 | 0.4311831574  | 2.0711713174  |
| H | -2.4521110699 | 1.8963960674  | -0.0346681024 |
| H | -2.1251828815 | 2.1788017825  | 2.9617250288  |
| H | -0.8994587569 | 2.5177361013  | 1.712796036   |
| H | -1.0557893089 | 0.08528319    | 3.145172479   |
| H | -4.8756886907 | 0.5166046269  | -0.3214021914 |
| H | -3.3803250278 | -0.3381513427 | -0.788821174  |
| H | -5.1419653397 | -1.8118557571 | -0.3682957304 |
| H | -4.266812383  | 3.0333515464  | 0.438782984   |

**d) C3'-endo-back TS-1 E= -1325.99662644 G= -1325.828214**

|   |               |               |              |
|---|---------------|---------------|--------------|
| O | -0.1520886275 | -1.8761535477 | 1.282273338  |
| C | 0.9295414637  | -1.901103161  | 2.216181865  |
| C | 1.9773575221  | -0.8996746375 | 1.6940153919 |
| C | 1.4643640388  | -0.4973834737 | 0.307753149  |
| C | -0.0388110149 | -0.7337949283 | 0.4425566831 |

|   |               |               |               |
|---|---------------|---------------|---------------|
| N | 1.4162119386  | -3.2636145297 | 2.3124418572  |
| C | 1.1251474032  | -4.0015185104 | 3.4316464041  |
| N | 1.6256940592  | -5.2913998045 | 3.4120189175  |
| C | 2.5914483019  | -5.799773442  | 2.5230365121  |
| C | 2.6400713466  | -5.0862698449 | 1.2693441804  |
| C | 2.0147255008  | -3.872984941  | 1.1892477504  |
| O | 0.4856632056  | -3.5821283678 | 4.3961336267  |
| S | 4.4747056057  | -5.2901362266 | 0.3313954074  |
| C | 4.2169989551  | -6.7583597141 | -0.4442595668 |
| N | 4.0242925727  | -7.7779488695 | -0.9797276236 |
| O | 3.2344489154  | -6.7950823756 | 2.8601516212  |
| O | 1.6835968991  | 0.8560455615  | -0.0333707234 |
| C | -0.7289068844 | -0.9962288994 | -0.8724177481 |
| O | -2.130005224  | -1.0272753612 | -0.6509957767 |
| H | 1.4661220263  | -5.8211976378 | 4.2618957182  |
| H | 1.903235652   | -3.3149578593 | 0.2646475319  |
| H | -0.4907523139 | 0.1457648217  | 0.9281115153  |
| H | 1.8717717441  | -1.1547927788 | -0.4734749264 |
| H | 1.9844001391  | -0.008622487  | 2.3276795399  |
| H | 2.9807840701  | -1.330265474  | 1.6835680593  |
| H | 0.5646415497  | -1.6363055284 | 3.2087696149  |
| H | -0.4568996202 | -0.192507353  | -1.5693829195 |
| H | -0.3702523366 | -1.9534521675 | -1.274607064  |
| H | -2.5747571666 | -1.2148479577 | -1.4857044317 |

H 2.6103118967 0.9768453878 -0.2727660354

**F. Transition state between anionradical and complex-2 forms of SCNdU (TS-2); one imaginary frequency found, abstracting CN<sup>-</sup>**

**a) C3'-exo-front TS-2 E= -1326.00740459 G= -1325.836037**

C 0.0380384969 -0.128631945 0.0110077836

N 0.015469533 -0.0210199959 1.4063634146

C 1.1518129253 0.0789694795 2.1509986616

N 2.3328503866 -0.0047902647 1.4323201756

C 2.4897283294 0.0152370602 0.0396183561

C 1.2545852818 -0.1682502592 -0.6882802321

C -1.2570081727 0.2358121044 2.0986008748

O -2.3003555127 -0.4294610408 1.4185059471

C -3.3341991764 0.4881173344 1.0382469137

C -3.1484618708 1.6950097756 1.954269027

C -1.6304411716 1.724333169 2.125720266

O -3.8149134587 1.4011548555 3.1734395754

C -3.2379688784 0.8687918008 -0.4308865299

O -3.209111015 -0.3270353387 -1.1923168867

O 1.1610154977 0.2421867984 3.3740091177

O 3.6257208226 0.148447621 -0.4188295346

S 1.2805455619 -0.1034748553 -2.4099629395

C 0.7009595471 1.6282385246 -2.744033921

N 0.1863149074 2.6315885673 -2.4241480877



|   |               |               |               |
|---|---------------|---------------|---------------|
| H | 3.1780508289  | 0.0985102767  | 1.9815120085  |
| H | -0.9092937303 | -0.3741585405 | -0.4505226142 |
| H | -4.2881330803 | -0.0123046028 | 1.2298371382  |
| H | -3.5419701177 | 2.6152217674  | 1.506758862   |
| H | -1.3187296747 | 2.2098205041  | 3.0527287037  |
| H | -1.1571963285 | 2.2408870295  | 1.2838678128  |
| H | -1.1512976897 | -0.1828762222 | 3.100187155   |
| H | -4.112713965  | 1.4807657036  | -0.6858505431 |
| H | -2.3314782765 | 1.4631005635  | -0.6139182205 |
| H | -3.1703017278 | -0.0986147231 | -2.1287609575 |
| H | -3.674694504  | 2.1305915808  | 3.790372859   |

**b) C3'-exo-back TS-2    E= -1326.00527568    G= -1325.835408**

|   |               |               |               |
|---|---------------|---------------|---------------|
| C | 0.0393413874  | -0.0939128699 | -0.0825500623 |
| N | 0.0236857798  | 0.0011766651  | 1.3139641783  |
| C | 1.1535564616  | 0.1838851136  | 2.0482798318  |
| N | 2.334827192   | 0.1606660234  | 1.324816121   |
| C | 2.4948218458  | 0.0285721159  | -0.0598472568 |
| C | 1.2501240553  | -0.007540422  | -0.7976028609 |
| C | -1.2540098876 | 0.1380579777  | 2.0337158731  |
| O | -2.2702612077 | -0.5230888596 | 1.3125584101  |
| C | -3.3500797315 | 0.3707976102  | 1.0103991887  |
| C | -3.2158061928 | 1.5083768367  | 2.0187790421  |
| C | -1.6990151072 | 1.599157553   | 2.1820912414  |

|   |               |               |               |
|---|---------------|---------------|---------------|
| O | -3.8558628289 | 1.0845446986  | 3.2131970386  |
| C | -3.2832715148 | 0.8696288915  | -0.4245432643 |
| O | -3.2037591734 | -0.2602332437 | -1.2765500551 |
| O | 1.1571003531  | 0.3601295721  | 3.2708489271  |
| O | 3.6397887696  | -0.029910982  | -0.5117800976 |
| S | 1.2996306939  | -0.3272995703 | -2.483535928  |
| C | 1.0316629064  | -2.1779273115 | -2.5391250093 |
| N | 0.7493033898  | -3.2232705771 | -2.0945592073 |
| H | 3.1807546811  | 0.2711198775  | 1.8711129103  |
| H | -0.9180863642 | -0.2579975971 | -0.555820533  |
| H | -4.2769741899 | -0.1899346985 | 1.1641193602  |
| H | -3.6579959852 | 2.4407694394  | 1.6485142957  |
| H | -1.3992377637 | 2.0255552058  | 3.1412399502  |
| H | -1.2627391947 | 2.2039940401  | 1.3804788815  |
| H | -1.1166092734 | -0.3510191153 | 2.9996045099  |
| H | -4.1864806871 | 1.4590079246  | -0.6274957312 |
| H | -2.4072564843 | 1.5192253008  | -0.5633122433 |
| H | -3.1964843131 | 0.0393583469  | -2.1935226272 |
| H | -3.728264115  | 1.7577331969  | 3.8934688715  |

**c) C3'-endo-front TS-2    E= -1326.00583869    G= -1325.836719**

|   |               |               |              |
|---|---------------|---------------|--------------|
| C | 0.0307905299  | 0.2136613648  | 0.0459309567 |
| N | -0.0290343535 | -0.2729018403 | 1.322168263  |
| C | 1.1130322454  | -0.4122691495 | 2.120021766  |

|   |               |               |               |
|---|---------------|---------------|---------------|
| C | 2.3858916036  | -0.07682718   | 1.6434075844  |
| C | 2.521817577   | 0.341475501   | 0.2646028016  |
| N | 1.2980244441  | 0.5771065298  | -0.37675697   |
| C | -1.2868096304 | -0.8529001159 | 1.7888549698  |
| C | -1.2518800446 | -2.3881566701 | 1.8921916637  |
| C | -1.1536700879 | -2.6599195869 | 3.3946223985  |
| C | -1.8534192103 | -1.4356647409 | 3.98372046    |
| O | -1.5399562594 | -0.3625418696 | 3.0986015368  |
| C | -1.4004071369 | -1.096075139  | 5.3817244221  |
| O | -2.2241445497 | -0.0584213457 | 5.888393322   |
| O | -1.8316186469 | -3.8205328599 | 3.8312896508  |
| S | 3.8009868558  | -0.4628100209 | 2.5476620674  |
| C | 3.7899428619  | -2.3248022929 | 2.4999397353  |
| N | 3.2327884698  | -3.343717295  | 2.336392286   |
| O | 3.560346379   | 0.5398317978  | -0.3657505266 |
| O | -0.9407775051 | 0.3284969999  | -0.7021788581 |
| H | 1.3505100904  | 0.9080578768  | -1.3331217823 |
| H | 0.9241666925  | -0.6167016853 | 3.1650238431  |
| H | -2.9388330756 | -1.6189554144 | 3.9831891391  |
| H | -0.1041935967 | -2.6866322523 | 3.7215045106  |
| H | -2.1963349728 | -2.8039102331 | 1.529400144   |
| H | -0.4280919657 | -2.8126246953 | 1.3138689382  |
| H | -2.0537792384 | -0.5006294023 | 1.1000537113  |
| H | -1.4825062017 | -2.0023131879 | 5.9963458018  |

H -0.3472636978 -0.7836774001 5.3507737322  
H -1.9383377372 0.158375461 6.7834835016  
H -1.3087038146 -4.5975723579 3.6000288508

**d) C3'-endo-back TS-2 E= -1326.00482254 G= -1325.834167**

C 0.0975665012 0.3498862468 0.0942187404  
N 0.1147522901 0.1741816606 1.4852888857  
C 1.2569463534 0.3796493979 2.2180817952  
N 2.3406840228 0.8460711289 1.4960511801  
C 2.4740150738 0.9419069486 0.1044843273  
C 1.2271583226 0.7816398606 -0.6111420819  
C -0.976309258 -0.5337440538 2.1469129462  
O -0.8049970562 -1.9346846068 1.9423956251  
C -1.9697338461 -2.51922265 1.3605896889  
C -2.7378922378 -1.3590557735 0.7106978355  
C -2.371531505 -0.1893616855 1.6190050044  
O -4.1392971648 -1.5456771393 0.7116002315  
C -1.5605064346 -3.5933122738 0.381695255  
O -0.9972140528 -4.6757602865 1.1060474542  
O 1.346846046 0.1813600229 3.4288122402  
O 3.5881910967 1.1770164329 -0.3619154897  
S 1.2399987686 0.8014610689 -2.3328416281  
C 1.1737735626 -1.0188690887 -2.7374680354  
N 0.9599314371 -2.1305906701 -2.4318363625

|   |               |               |               |
|---|---------------|---------------|---------------|
| H | 3.1865531813  | 0.9840527279  | 2.0368806825  |
| H | -0.8711320644 | 0.2998601629  | -0.3809890057 |
| H | -2.5997350662 | -2.9559931345 | 2.1499947658  |
| H | -2.3802233783 | -1.2043535812 | -0.3166025852 |
| H | -3.0762032405 | -0.1900366232 | 2.456032393   |
| H | -2.4182125832 | 0.7869392223  | 1.1339965832  |
| H | -0.8693247754 | -0.31375678   | 3.2079206639  |
| H | -2.450605615  | -3.9207174537 | -0.1744542293 |
| H | -0.8361291034 | -3.1677483864 | -0.3270937691 |
| H | -0.6674158554 | -5.3314981298 | 0.4807087142  |
| H | -4.3928770521 | -2.0918943467 | -0.0420861128 |

**G. Radical rad-dU, formed via abstracting SCN<sup>-</sup> from anionradical SCNdU**

**a) C3'-exo rad-dU    E= -834.866664494    G= -834.696449**

|   |               |               |               |
|---|---------------|---------------|---------------|
| C | -0.0555613029 | -0.247065744  | 0.0768000205  |
| C | 0.038873771   | -0.0824906199 | 1.6026956464  |
| O | 1.3975980861  | -0.0573972263 | 1.9388200732  |
| C | 2.2106797067  | -0.0134418593 | 0.753845053   |
| C | 1.3583326139  | -0.6873006692 | -0.3145190076 |
| N | -0.5987756554 | 1.1798979373  | 2.0752165991  |
| C | 0.1335517471  | 2.2464930991  | 2.5549013375  |
| C | -0.4928686854 | 3.3533328509  | 2.9675198173  |
| C | -1.9206579721 | 3.5281731055  | 2.9664249293  |
| N | -2.5602326825 | 2.3830414401  | 2.4760962499  |

|   |               |               |               |
|---|---------------|---------------|---------------|
| C | -1.9781464272 | 1.2145547594  | 2.0234026105  |
| O | -2.6386236172 | 0.2739203467  | 1.6030572245  |
| O | -2.5665062442 | 4.501821336   | 3.3255468183  |
| C | 2.5872903377  | 1.4141234678  | 0.3969314816  |
| O | 3.2099473035  | 1.9862379883  | 1.535092085   |
| O | 1.5412969575  | -2.0858866127 | -0.1646475284 |
| H | -3.5748924123 | 2.4071312218  | 2.432552469   |
| H | 1.2132492687  | 2.1130293784  | 2.5659957078  |
| H | 3.1110918495  | -0.5921845976 | 0.9749098926  |
| H | 1.630816417   | -0.3628210805 | -1.325167167  |
| H | -0.8117914487 | -0.9800131007 | -0.2068084705 |
| H | -0.3105834438 | 0.7062676514  | -0.3950202525 |
| H | -0.4534530238 | -0.8902918184 | 2.148062306   |
| H | 3.2674669369  | 1.3929430312  | -0.4625857936 |
| H | 1.6936946749  | 1.9906955961  | 0.1136715326  |
| H | 3.5520394637  | 2.8577326796  | 1.3018477315  |
| H | 0.9880423963  | -2.5460569592 | -0.8083430525 |

**b) C3'-endo rad-dU    E= -834.863865038    G= -834.695870**

|   |               |               |              |
|---|---------------|---------------|--------------|
| C | 0.1151921923  | -0.5063800275 | 0.1738276203 |
| N | -0.0171834827 | 0.0886630451  | 1.4149115796 |
| C | 1.0423805806  | 0.7353790156  | 2.0147892279 |
| C | 2.2342813271  | 0.7796253562  | 1.4133242167 |
| C | 2.5118487618  | 0.2044782232  | 0.1232733403 |

|   |               |               |               |
|---|---------------|---------------|---------------|
| N | 1.3674230998  | -0.4067362401 | -0.4023365971 |
| C | -1.3626031007 | -0.0199175433 | 2.0512383237  |
| C | -1.6076018855 | -1.4077322882 | 2.6450258524  |
| C | -1.1958403174 | -1.2183012965 | 4.1056762804  |
| C | -1.6385586682 | 0.2197374145  | 4.3603863744  |
| O | -1.4206668387 | 0.8971464063  | 3.1126069889  |
| C | -0.8860249627 | 0.9109454092  | 5.4693512332  |
| O | -1.4665729704 | 2.1860921013  | 5.678734373   |
| O | -1.8517637375 | -2.0664013886 | 5.0212579591  |
| O | 3.564295711   | 0.207851921   | -0.4966350258 |
| O | -0.8118224045 | -1.0852428185 | -0.3750448934 |
| H | 1.4590604141  | -0.8423095207 | -1.315540372  |
| H | 0.825351583   | 1.2011975528  | 2.9693680648  |
| H | -2.7138041721 | 0.2268170135  | 4.5878520668  |
| H | -0.1044434471 | -1.298405333  | 4.2181871544  |
| H | -2.6777364142 | -1.6342487318 | 2.6102196269  |
| H | -1.0612854737 | -2.1909015651 | 2.1180790094  |
| H | -2.0810973675 | 0.2494616326  | 1.2755320464  |
| H | -0.96301643   | 0.2840146095  | 6.3673886162  |
| H | 0.1747902748  | 0.9983747719  | 5.1971893685  |
| H | -1.0092698998 | 2.6237223054  | 6.4064613072  |
| H | -1.4519634436 | -2.9437093957 | 4.9836393506  |

**H. Radical rad-S-dU formed via abstracting CN<sup>-</sup> from anionradical SCNdU**

**a) C3'-exo rad-S-dU    E= -1233.09375526    G= -1232.922596**

|   |               |               |               |
|---|---------------|---------------|---------------|
| C | -0.0532578282 | -0.4065215421 | 0.0772541843  |
| N | -0.0551628007 | 0.0568021352  | 1.3402580199  |
| C | 1.1164956198  | 0.4599824077  | 1.9877273562  |
| N | 2.2572276575  | 0.3498168094  | 1.2325942948  |
| C | 2.3764225062  | -0.0962889891 | -0.0836305365 |
| C | 1.0940660957  | -0.5035789966 | -0.7004022518 |
| C | -1.3114890963 | 0.1672786524  | 2.1525795184  |
| O | -2.3507105031 | -0.4568211777 | 1.4632507413  |
| C | -3.3273576069 | 0.5111816463  | 1.0372996623  |
| C | -3.2178449566 | 1.6285692232  | 2.0679318643  |
| C | -1.7172612801 | 1.6345983723  | 2.3782345814  |
| O | -3.9901087278 | 1.2295416539  | 3.1875772289  |
| C | -3.0554166278 | 0.9807550982  | -0.3816295294 |
| O | -3.0029308449 | -0.1717979245 | -1.2050446069 |
| O | 1.1020766541  | 0.8741313484  | 3.1314725776  |
| O | 3.4689619619  | -0.1258010133 | -0.617470703  |
| S | 1.0213470665  | -1.068187839  | -2.2966021751 |
| H | 3.1148747507  | 0.6387518795  | 1.6936956056  |
| H | -1.0201988131 | -0.7052542414 | -0.3196608425 |
| H | -4.2975636943 | 0.0104784839  | 1.0855956211  |
| H | -3.5638300505 | 2.5904883939  | 1.6732036106  |
| H | -1.5043384671 | 1.9612858194  | 3.3965455605  |
| H | -1.1805568785 | 2.2935740481  | 1.6897397106  |



|   |               |               |               |
|---|---------------|---------------|---------------|
| H | -1.1109713473 | -0.3721395641 | 3.0797775773  |
| H | -3.8620403139 | 1.6567625827  | -0.6886380399 |
| H | -2.1068297924 | 1.5371761441  | -0.4313664429 |
| H | -2.9105912001 | 0.1010601468  | -2.1260617135 |
| H | -3.9115064145 | 1.8980457912  | 3.8796666979  |

**b) C3'-endo rad-S-dU    E= -1233.09032133    G= -1232.921436**

|   |               |               |               |
|---|---------------|---------------|---------------|
| C | -0.0388237896 | -0.3703762332 | 0.2538035321  |
| C | 0.1094865939  | -0.0798623637 | 1.7470922781  |
| O | 1.4762219496  | 0.0562475358  | 2.0087676916  |
| C | 2.2450335698  | -0.0573690965 | 0.7979943319  |
| C | 1.2498371103  | 0.2171239417  | -0.3260670192 |
| N | -0.5731456875 | 1.2032966446  | 2.1304569222  |
| C | 0.1056747082  | 2.3199284225  | 2.4480053056  |
| C | -0.4996962722 | 3.5168805129  | 2.8064821047  |
| C | -1.9793429764 | 3.5446722885  | 2.8509440195  |
| N | -2.5801991652 | 2.3286301463  | 2.5268408443  |
| C | -1.9711962036 | 1.1493262865  | 2.1778371973  |
| O | -2.5806218503 | 0.1282227488  | 1.922940605   |
| O | -2.6676161541 | 4.5039193633  | 3.141311868   |
| S | 0.4185840672  | 4.8872921735  | 3.1916618806  |
| C | 3.41742592    | 0.8904017626  | 0.8316298067  |
| O | 4.321229193   | 0.449285218   | 1.8290515616  |
| O | 1.7083592255  | -0.4132699778 | -1.5003914827 |

|   |               |               |               |
|---|---------------|---------------|---------------|
| H | -3.5950673641 | 2.3010132531  | 2.5609491623  |
| H | 1.1853641647  | 2.2311889078  | 2.4223114148  |
| H | 2.610051463   | -1.0896479787 | 0.7076232372  |
| H | 1.1504687424  | 1.3010149637  | -0.4830456572 |
| H | -0.0319412297 | -1.4533341562 | 0.09779019    |
| H | -0.95458133   | 0.0422877445  | -0.1699989323 |
| H | -0.3306074339 | -0.8449834713 | 2.3878770488  |
| H | 3.883349093   | 0.8797336036  | -0.1626738555 |
| H | 3.0643312514  | 1.9100446756  | 1.0384561906  |
| H | 5.0823145606  | 1.041335421   | 1.8462937957  |
| H | 1.2107861504  | -0.0803529124 | -2.2569701916 |

**I. Anion SCN<sup>-</sup>                    E= -491.135262236     G= -491.144665**

|   |               |              |               |
|---|---------------|--------------|---------------|
| C | 0.1692315331  | 0.0000000082 | -0.0172374042 |
| N | -0.0885615562 | 0.           | 1.1284008604  |
| S | 0.5349662812  | 0.           | -1.6446101736 |

**J. Anion CN<sup>-</sup>                    E= -92.9322830053     G= -92.946331**

|   |    |    |               |
|---|----|----|---------------|
| C | 0. | 0. | -0.0091755211 |
| N | 0. | 0. | 1.1671755211  |
